# Supplementary material
Source: PubMed Central journal article supplement (PMC4260963)
Supplement: jo502325w_si_001.pdf [file jo502325w_si_001.pdf]

# Supporting Information

## Linear Free Energy Relationships Reveal Structural Changes in Hydrogen-Bonded Host-Guest Interactions

Jacqueline M. McGrath and Michael D. Pluth\*

Department of Chemistry and Biochemistry  
Materials Science Institute  
University of Oregon  
Eugene, OR 97403-1253.

### Contact Information:

Michael D. Pluth  
pluth@uoregon.edu

| Table of Contents |                                                                                                     | Page |
|-------------------|-----------------------------------------------------------------------------------------------------|------|
| 1.                | $^1\text{H}$ and $^{13}\text{C}\{^1\text{H}\}$ NMR spectra of compounds <b>1a-c</b> and <b>2a-g</b> | S2   |
| 2.                | Titration data for compounds <b>2a-f</b> with barbital                                              | S11  |
| 3.                | Calculated Geometries                                                                               | S13  |

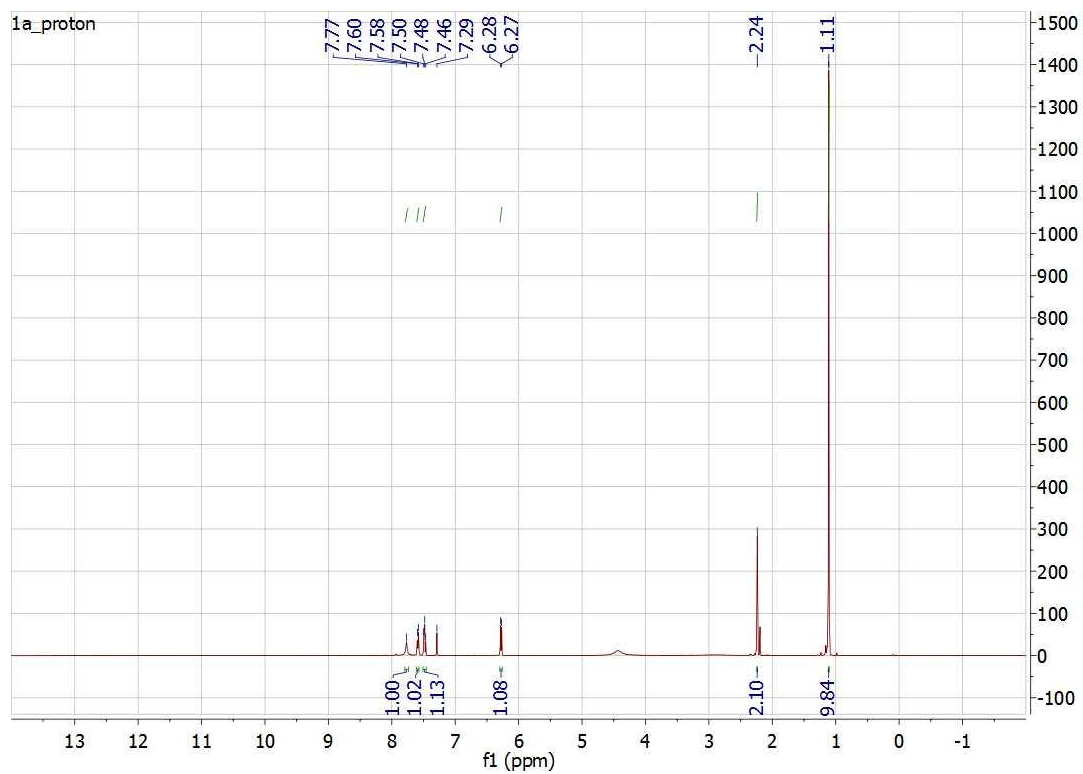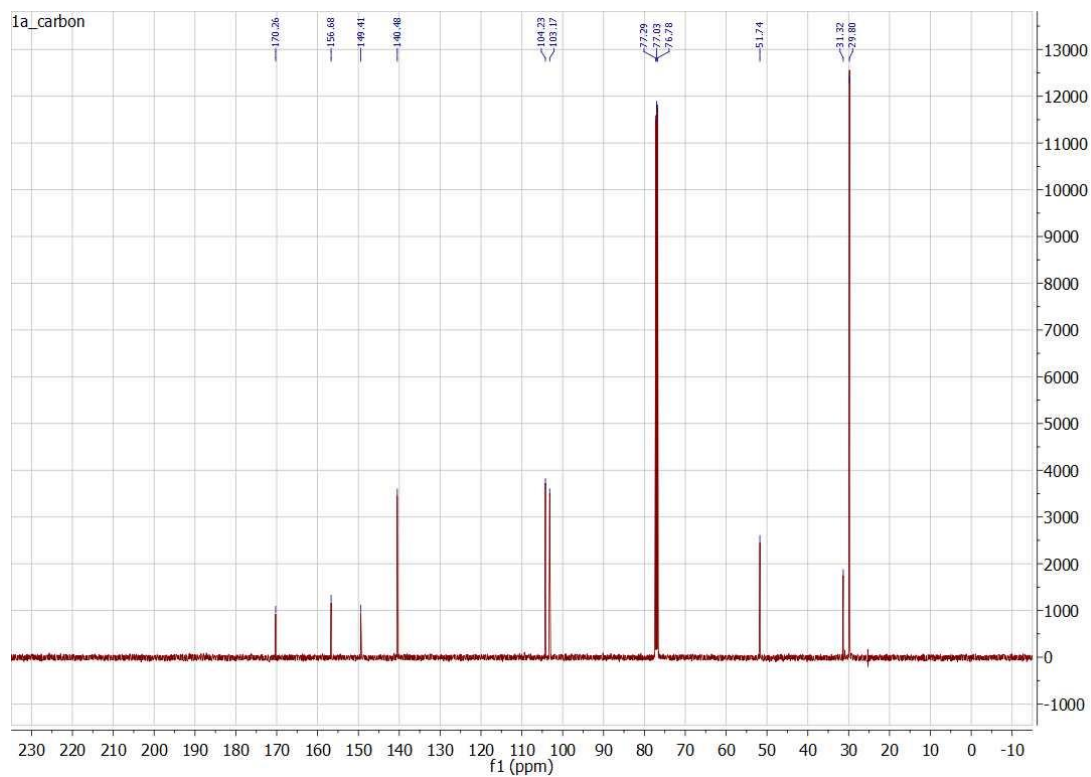

**Figure S1.**  $^1\text{H}$  (500 MHz,  $\text{CDCl}_3$ ) and  $^{13}\text{C}\{^1\text{H}\}$  (125 MHz,  $\text{CDCl}_3$ ) NMR spectra of **1a**.

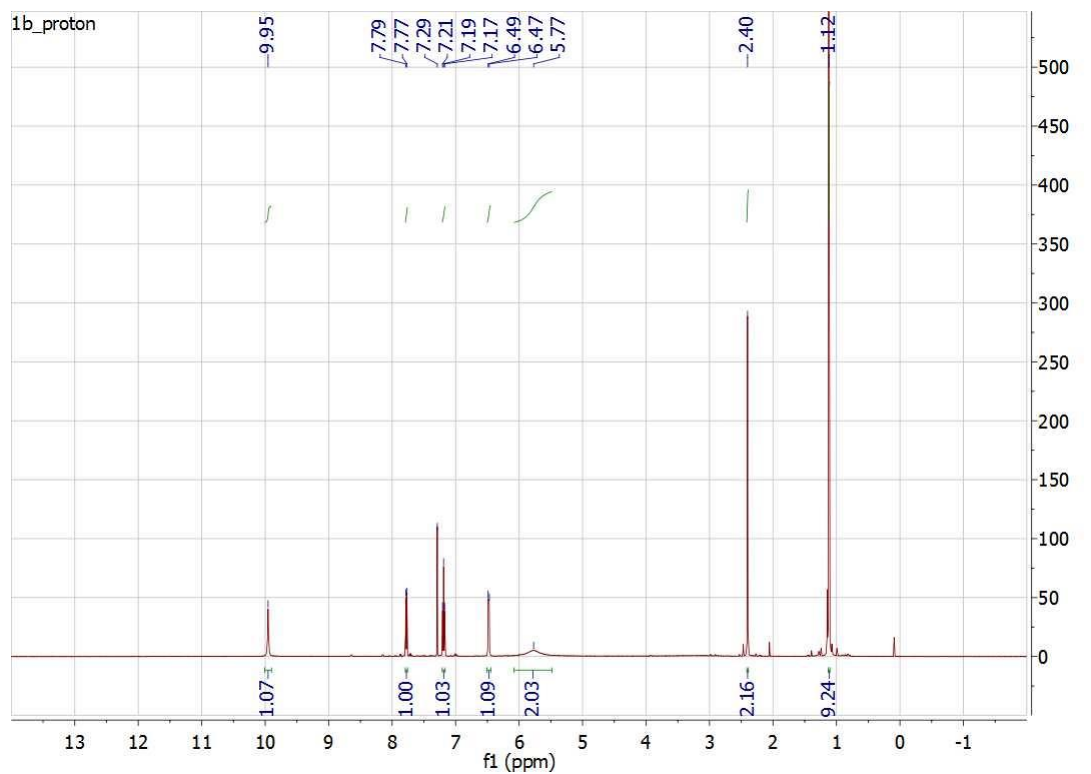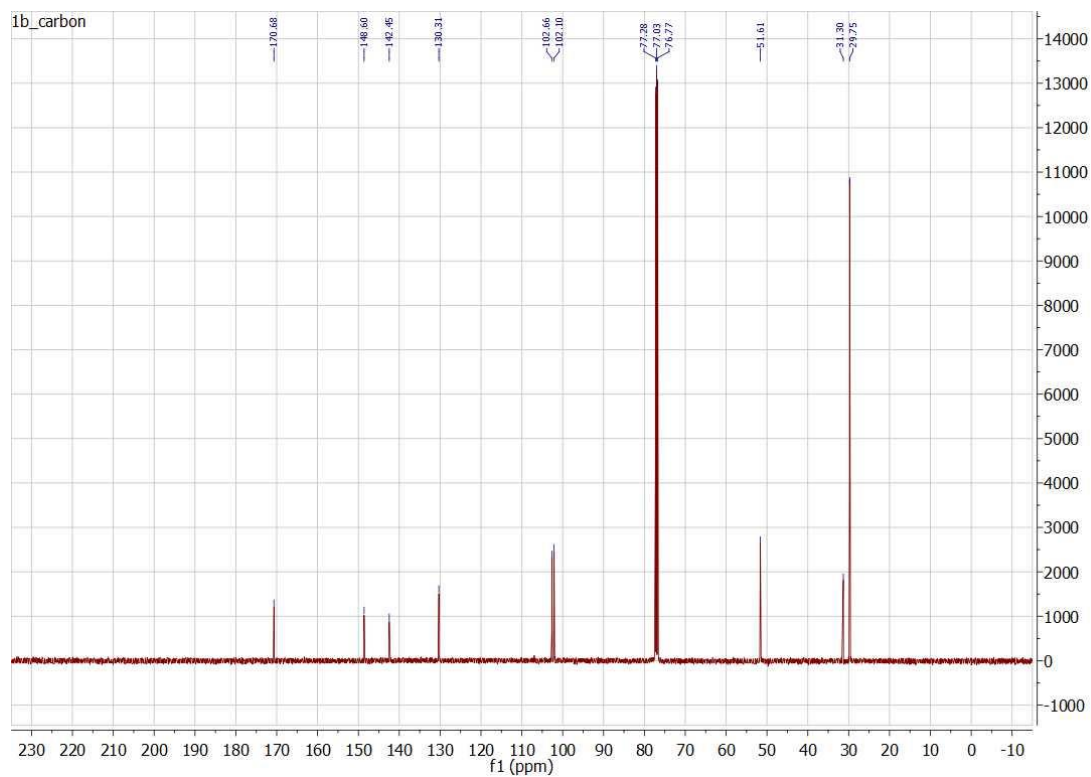

**Figure S2.**  $^1\text{H}$  (500 MHz,  $\text{CDCl}_3$ ) and  $^{13}\text{C}\{^1\text{H}\}$  (125 MHz,  $\text{CDCl}_3$ ) NMR spectra of **1b**.

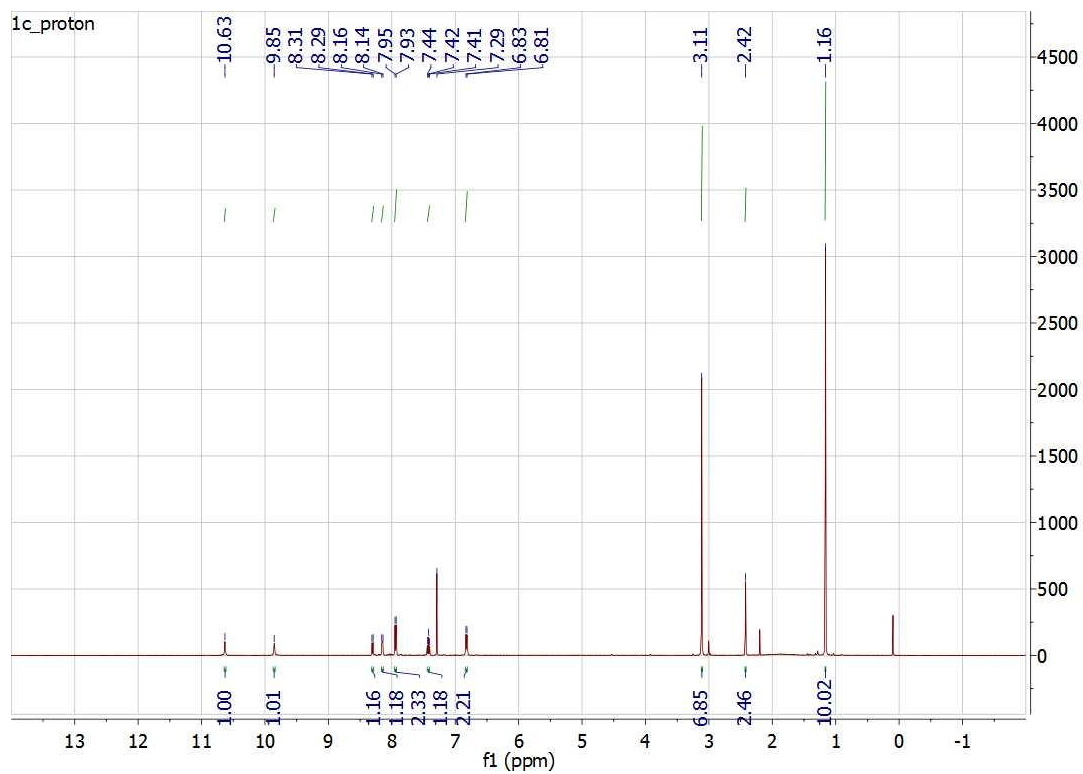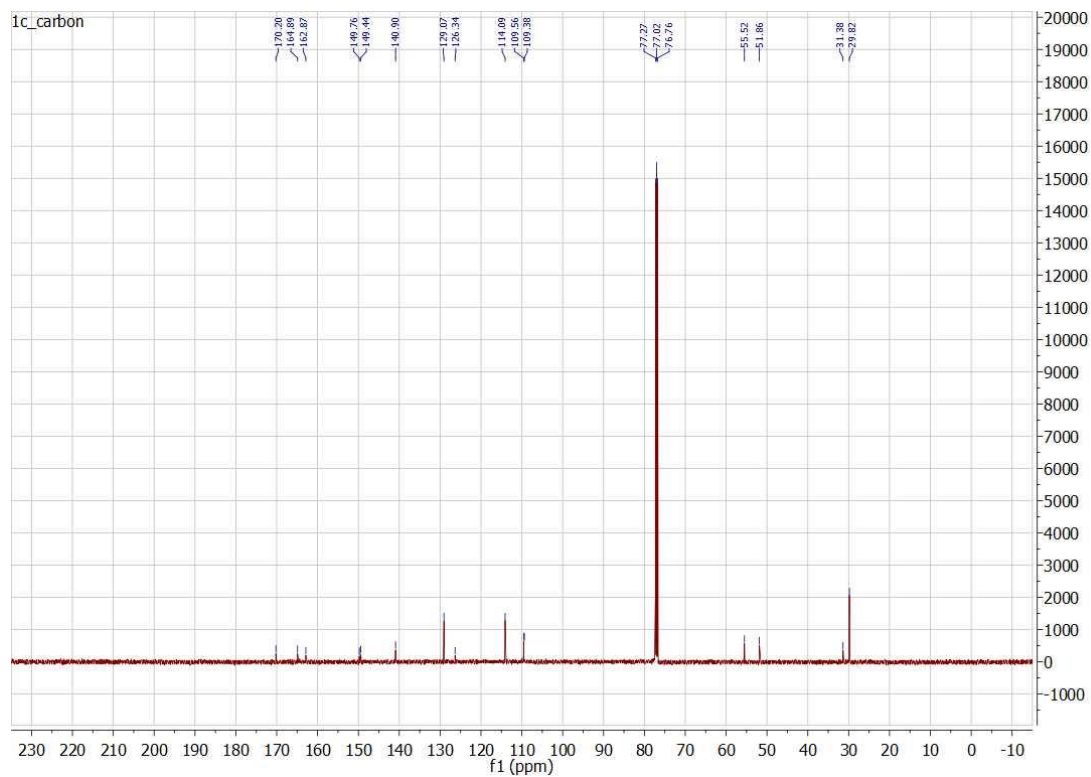

**Figure S3.**  $^1\text{H}$  (500 MHz,  $\text{CDCl}_3$ ) and  $^{13}\text{C}\{^1\text{H}\}$  (125 MHz,  $\text{CDCl}_3$ ) NMR spectra of **1c**.

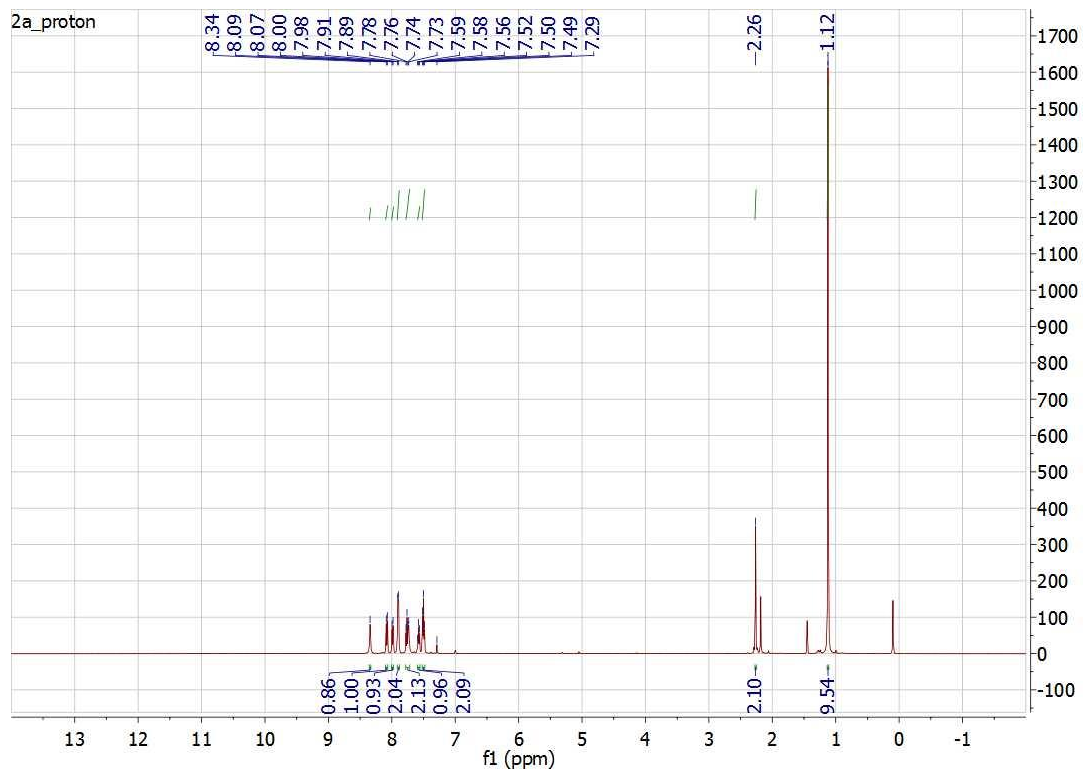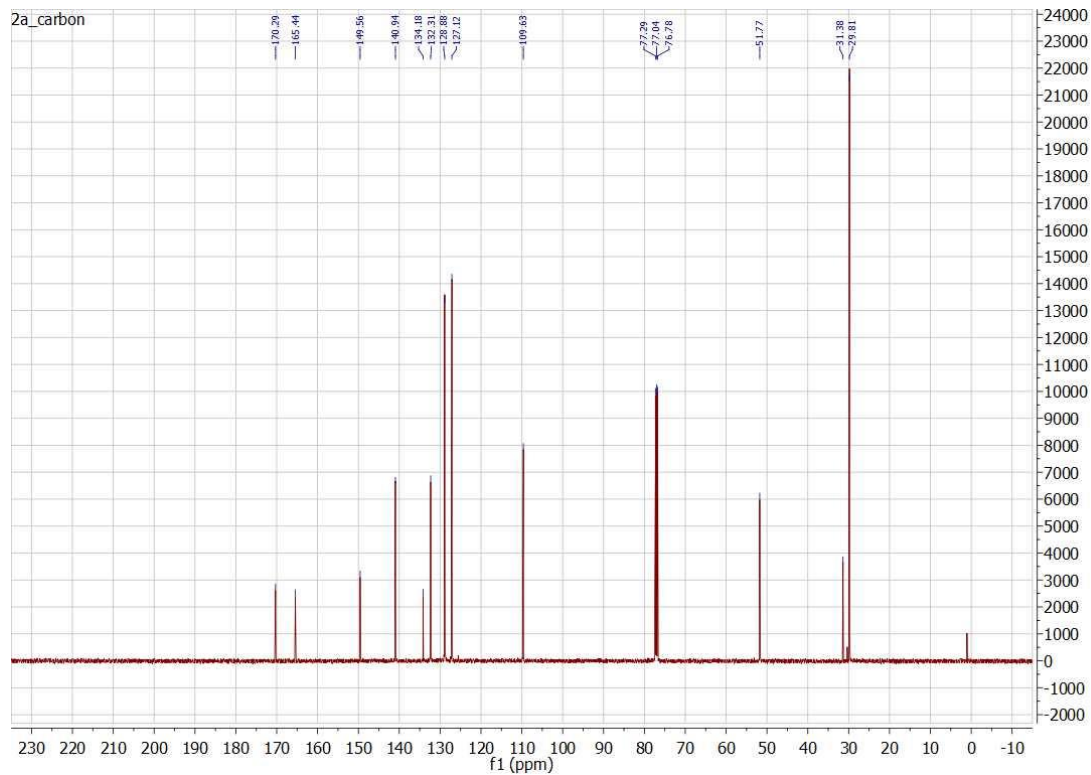

**Figure S4.**  $^1\text{H}$  (500 MHz,  $\text{CDCl}_3$ ) and  $^{13}\text{C}\{^1\text{H}\}$  (125 MHz,  $\text{CDCl}_3$ ) NMR spectra of **2a**.

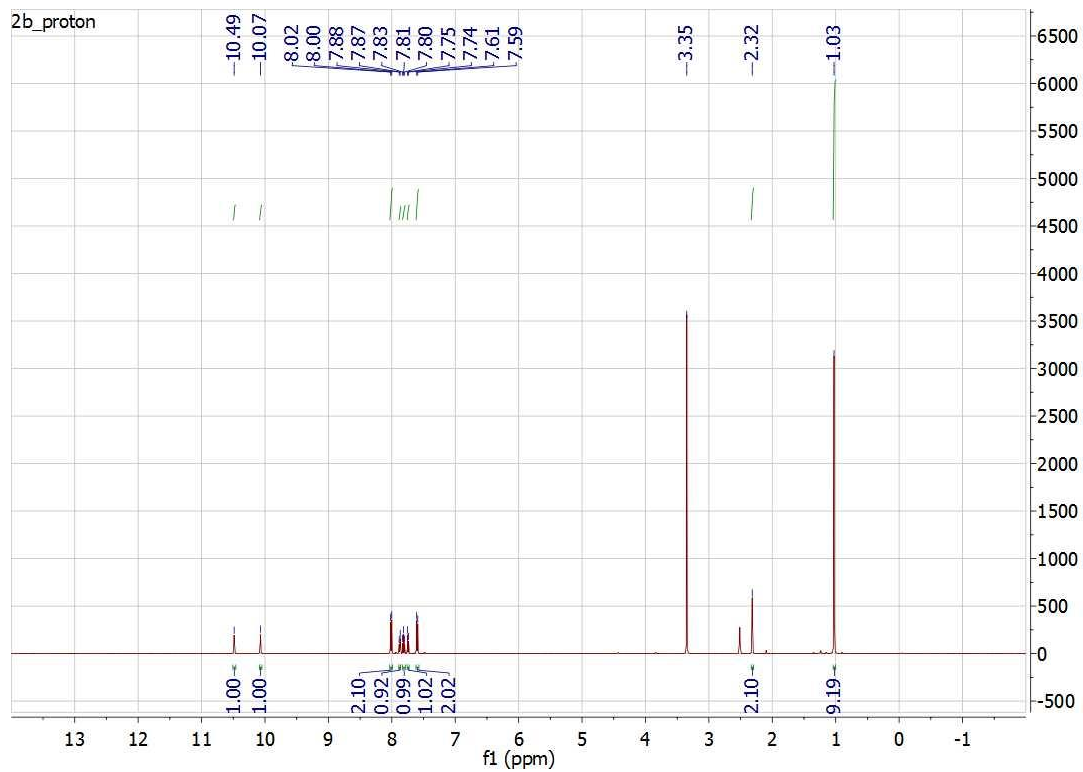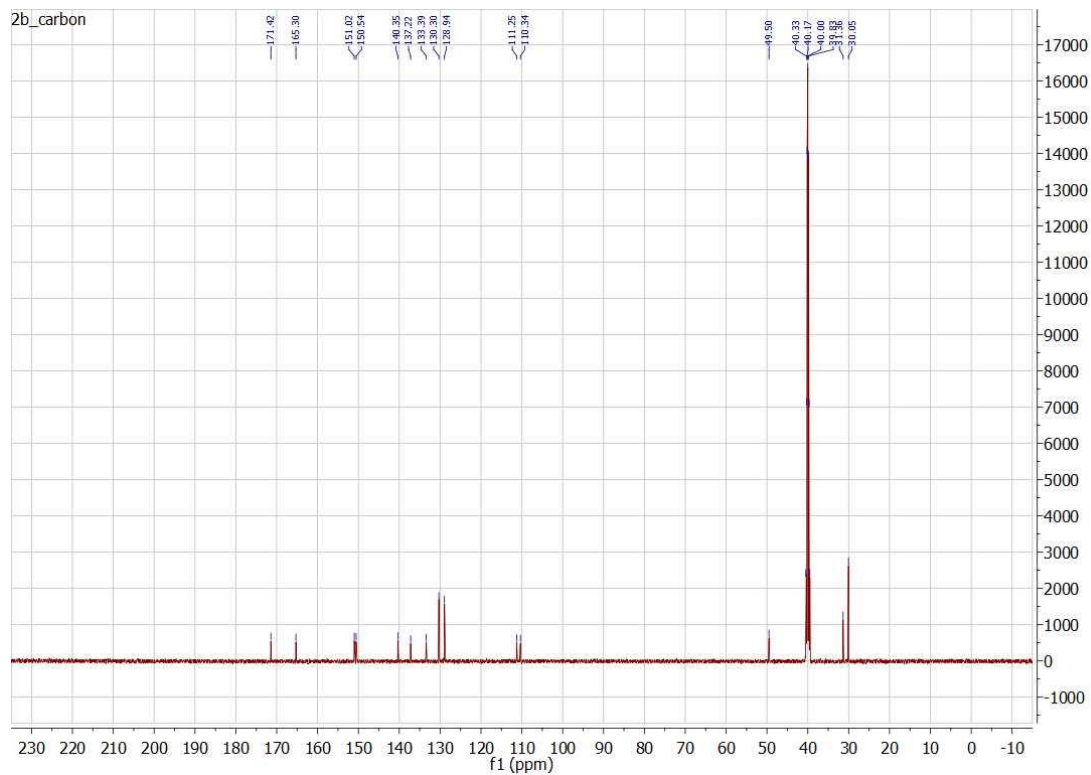

**Figure S5.**  $^1\text{H}$  (500 MHz, DMSO) and  $^{13}\text{C}\{^1\text{H}\}$  (125 MHz, DMSO) NMR spectra of **2b**.

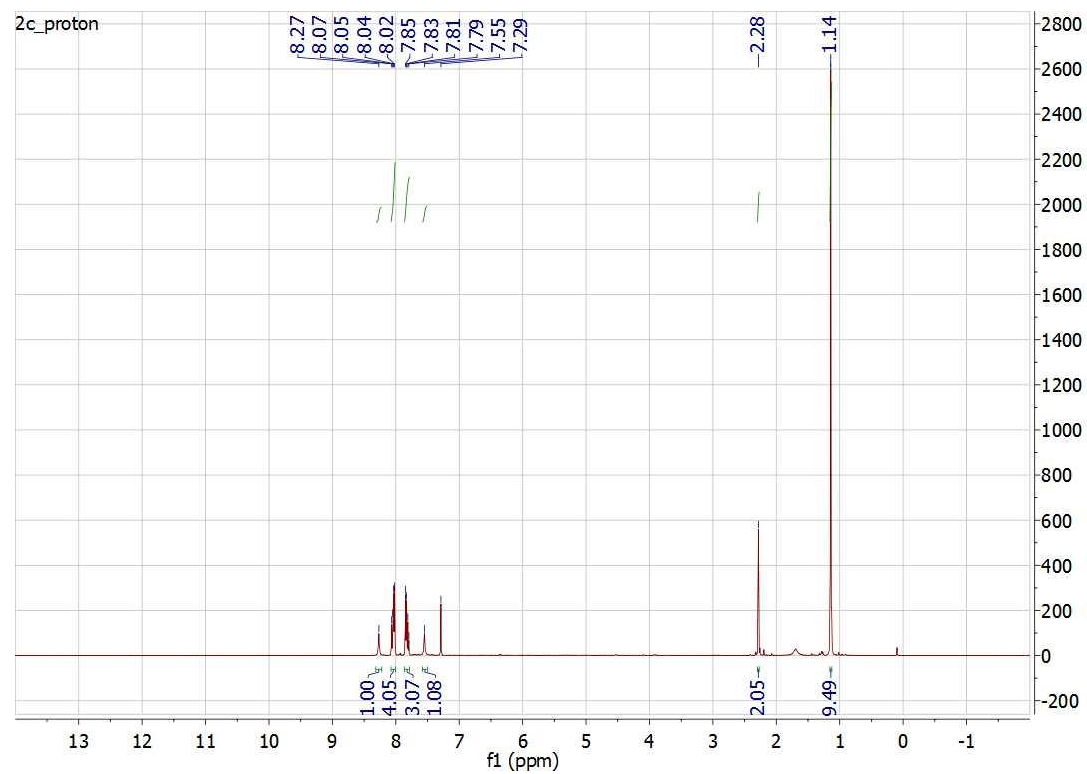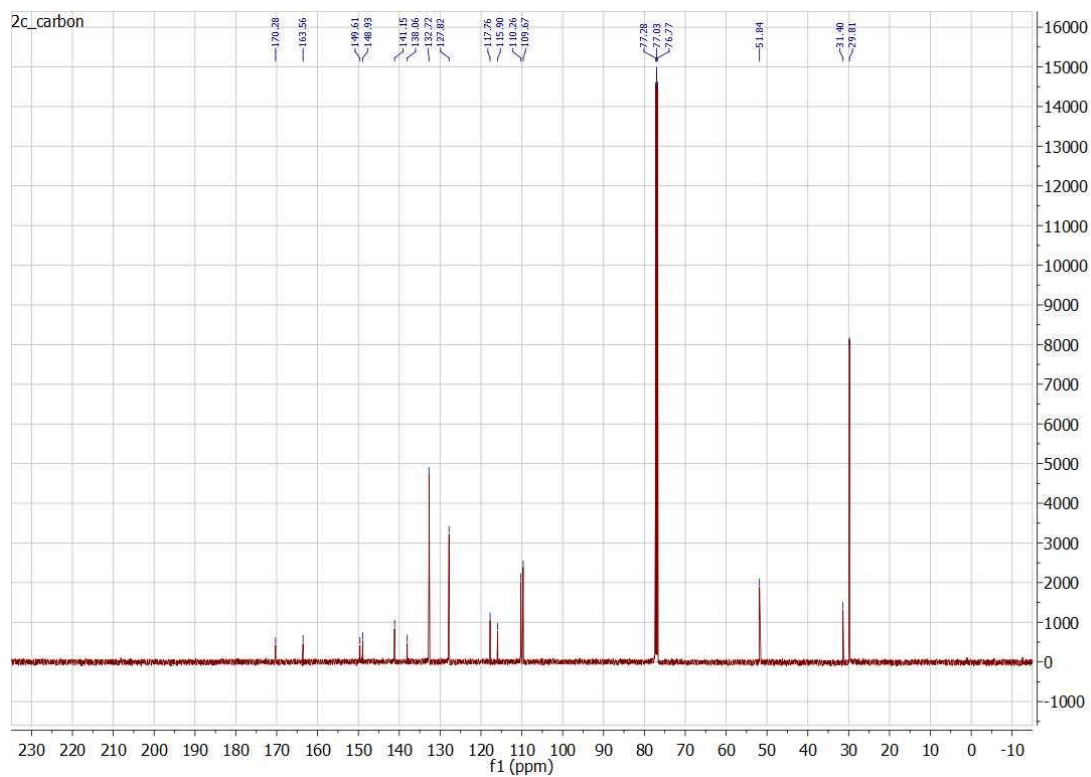

**Figure S6.**  $^1\text{H}$  (500 MHz,  $\text{CDCl}_3$ ) and  $^{13}\text{C}\{^1\text{H}\}$  (125 MHz,  $\text{CDCl}_3$ ) NMR spectra of **2c**.

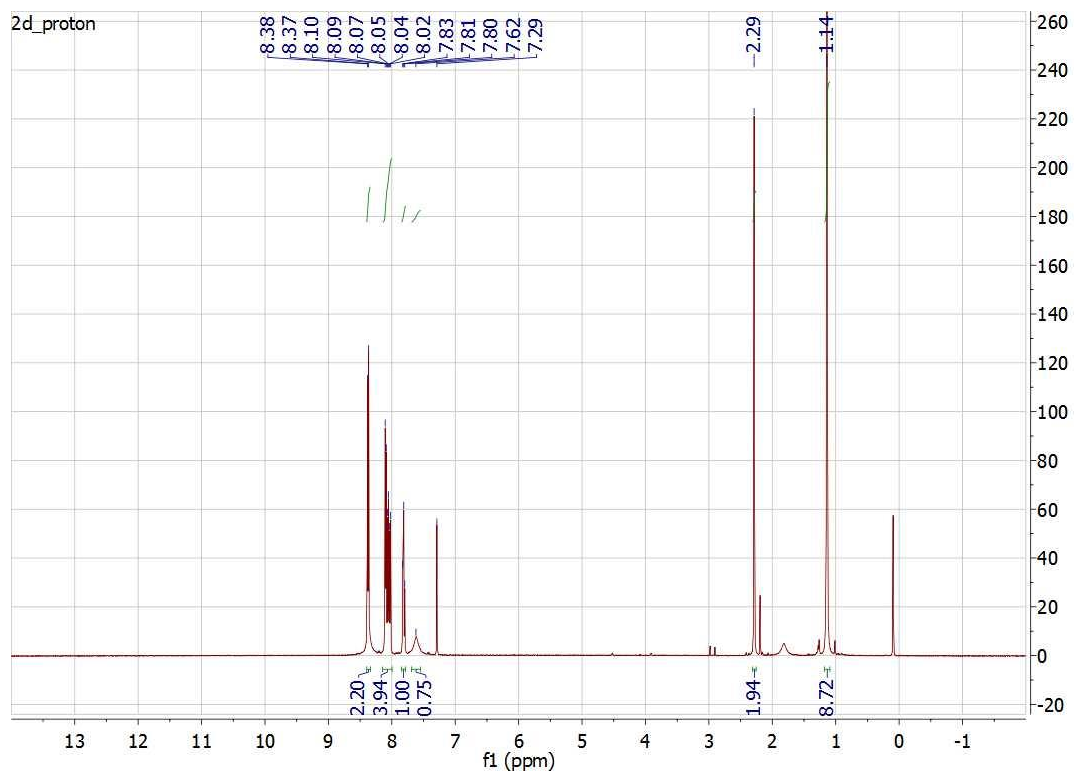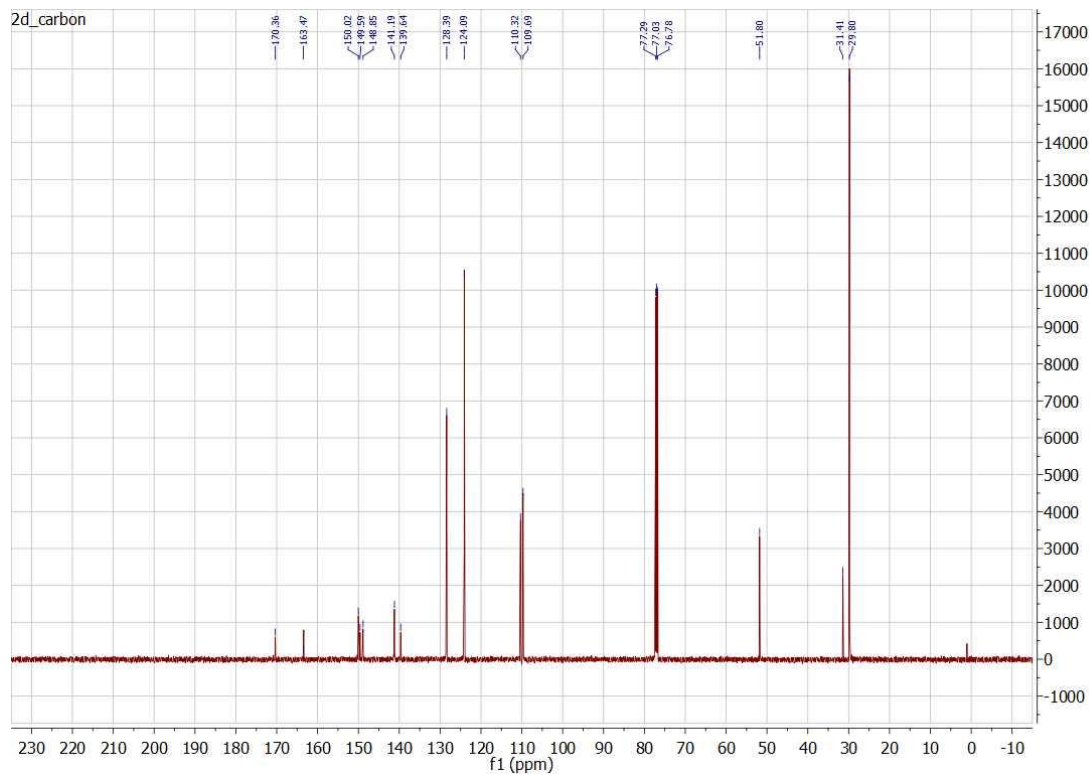

**Figure S7.**  $^1\text{H}$  (500 MHz,  $\text{CDCl}_3$ ) and  $^{13}\text{C}\{^1\text{H}\}$  (125 MHz,  $\text{CDCl}_3$ ) NMR spectra of **2d**.



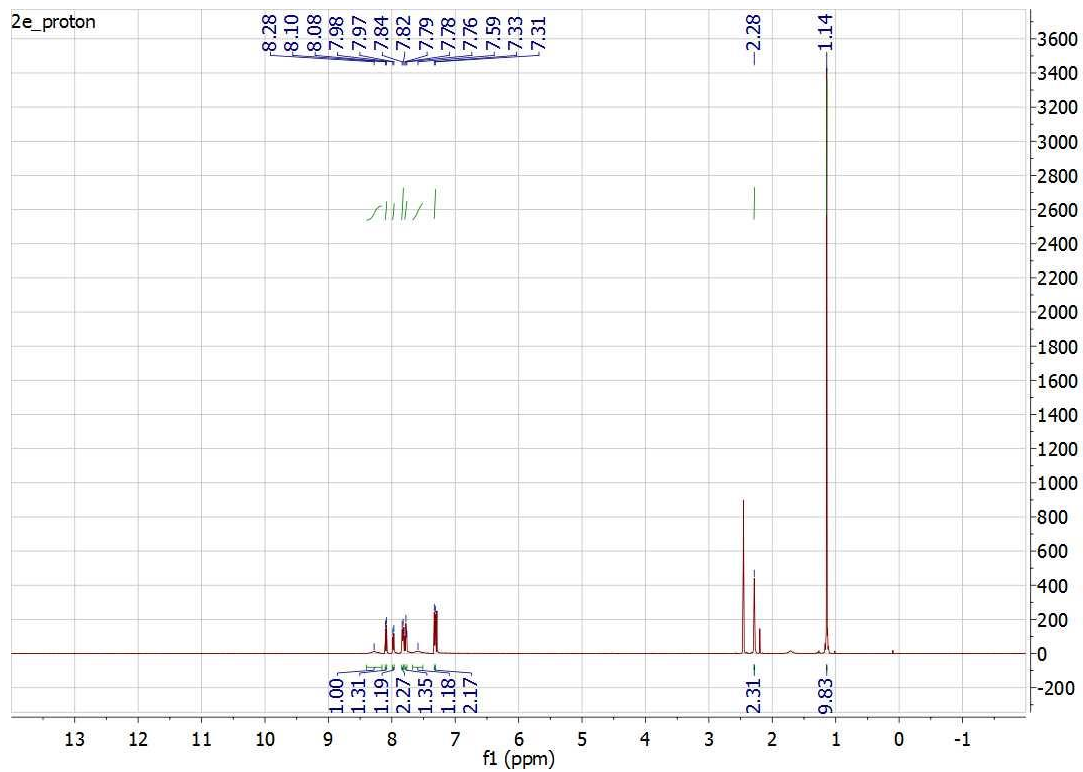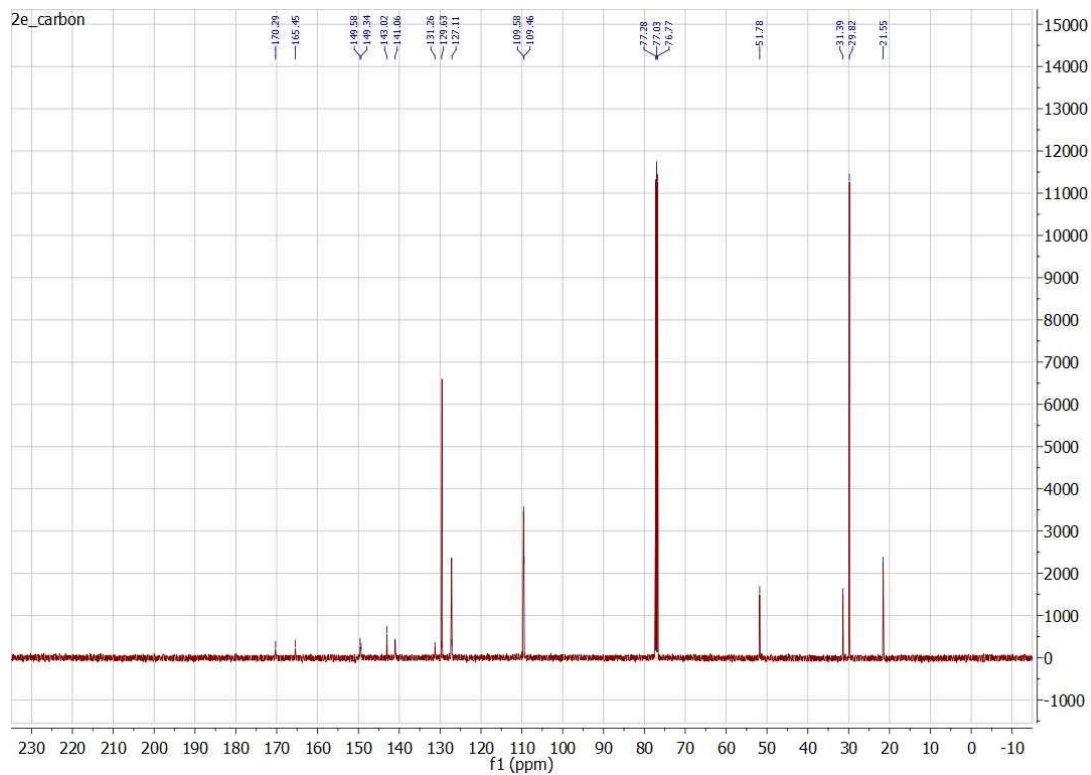

**Figure S8.**  $^1\text{H}$  (500 MHz,  $\text{CDCl}_3$ ) and  $^{13}\text{C}\{^1\text{H}\}$  (125 MHz,  $\text{CDCl}_3$ ) NMR spectra of **2e**.

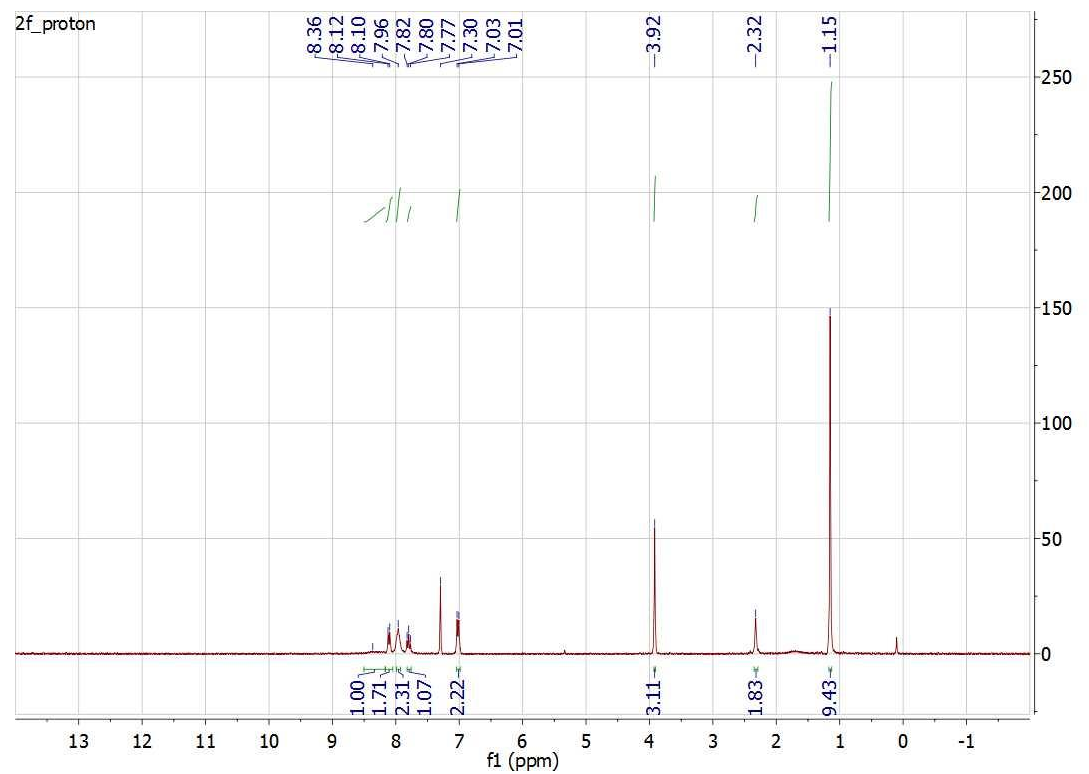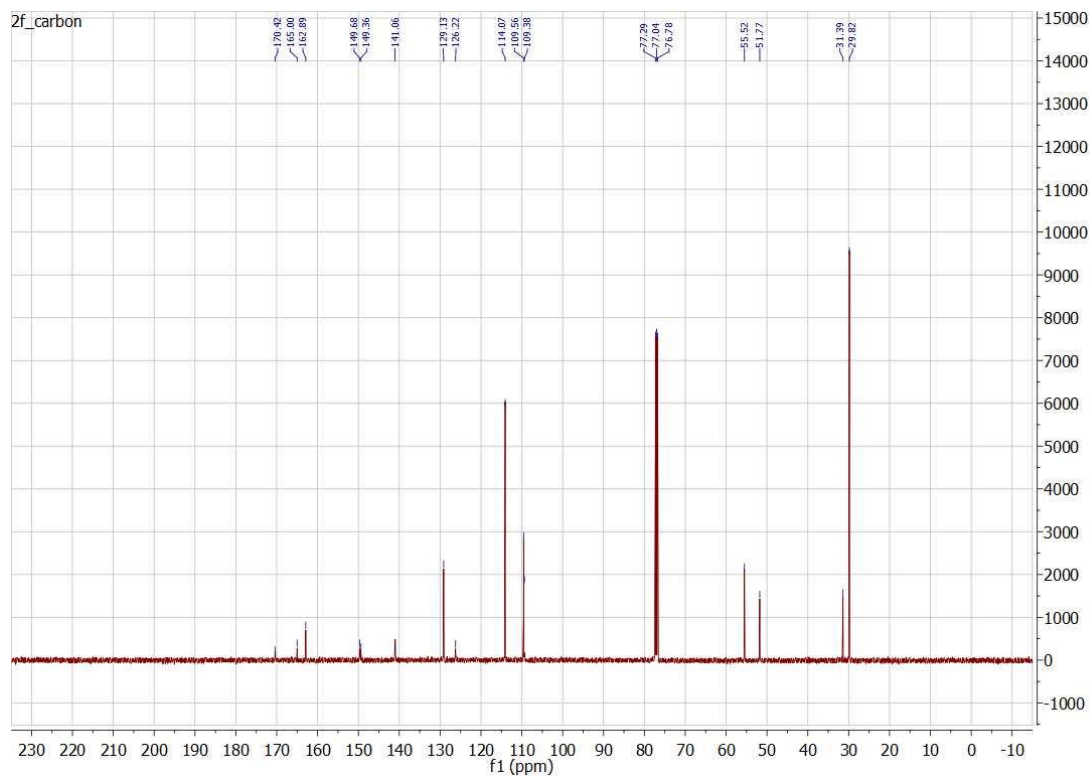

**Figure S9.**  $^1\text{H}$  (500 MHz,  $\text{CDCl}_3$ ) and  $^{13}\text{C}\{^1\text{H}\}$  (125 MHz,  $\text{CDCl}_3$ ) NMR spectra of **2f**.

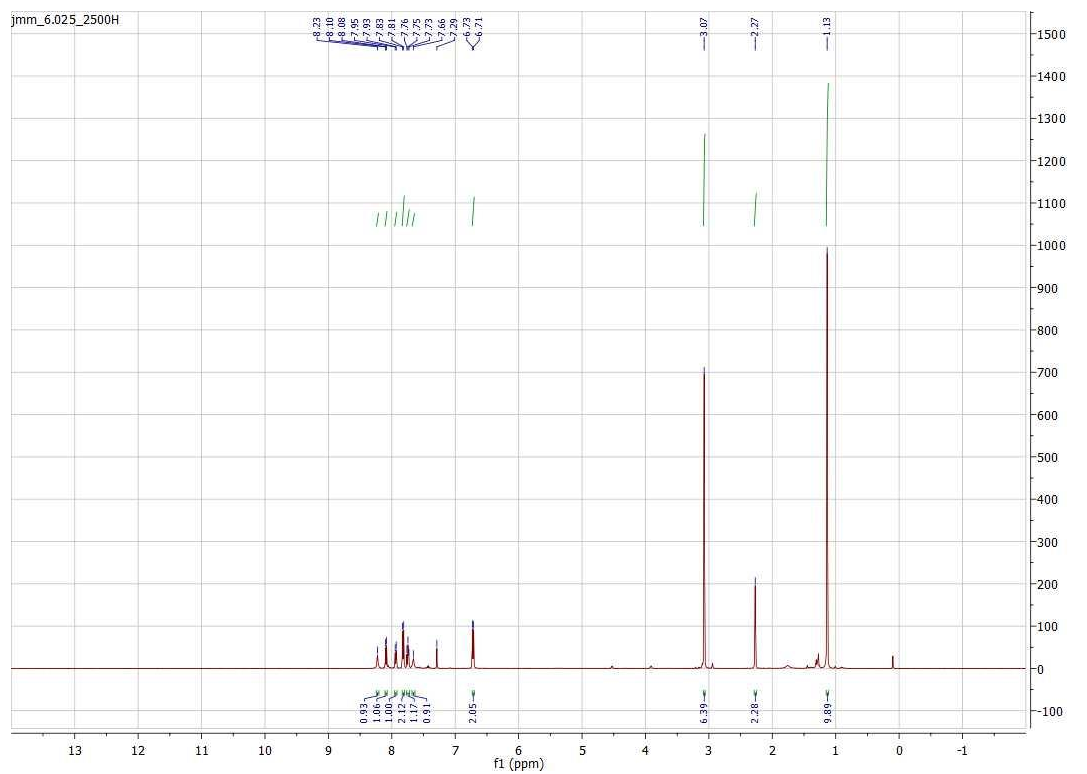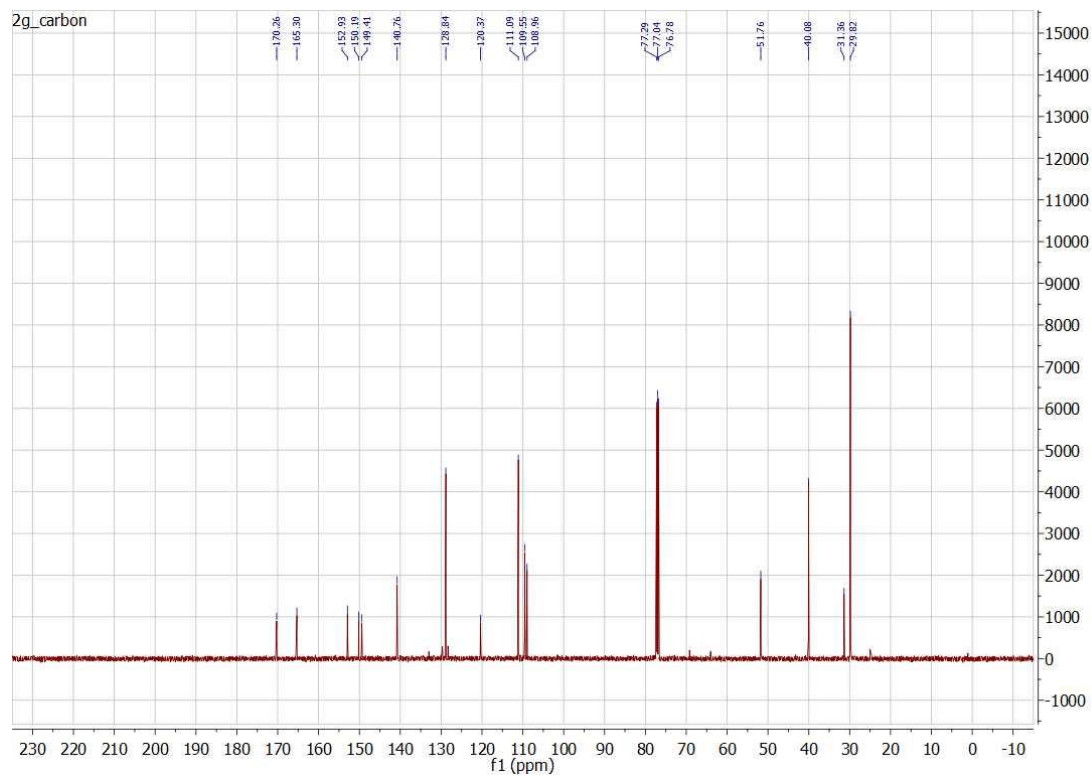

**Figure S10.** <sup>1</sup>H (500 MHz, CDCl<sub>3</sub>) and <sup>13</sup>C{<sup>1</sup>H} (125 MHz, CDCl<sub>3</sub>) NMR spectra of **2g**.

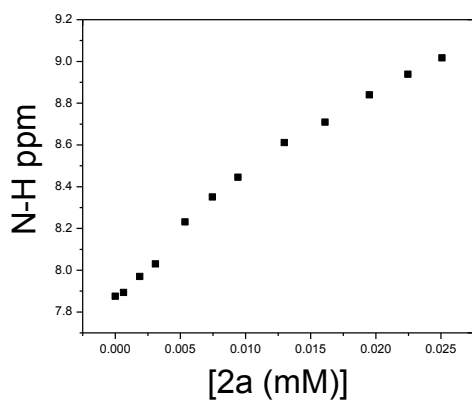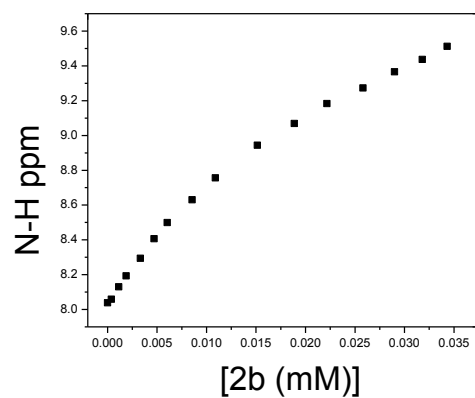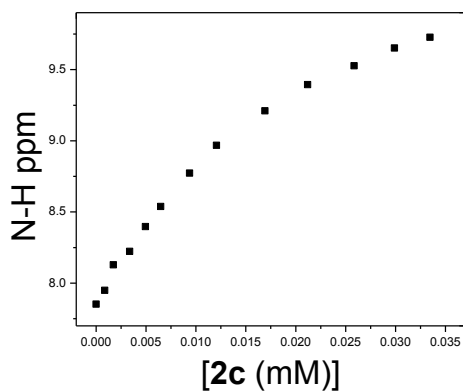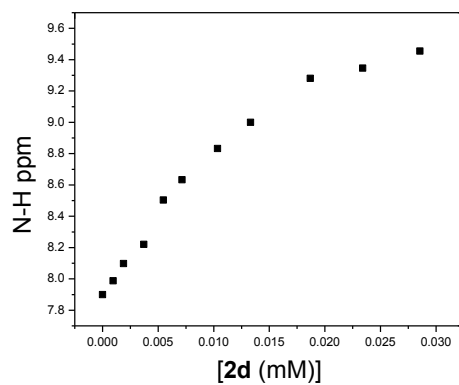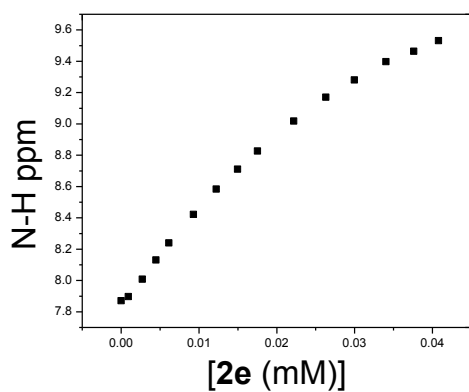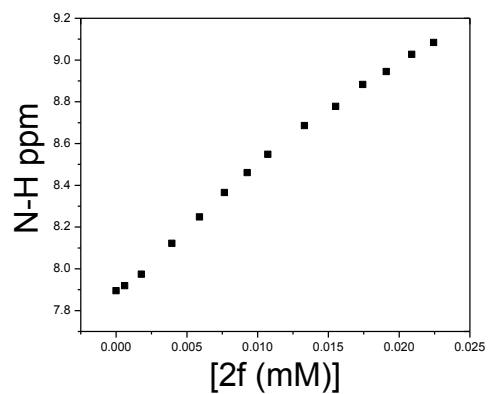

**Figure S11.**  $^1\text{H}$  NMR (500 MHz,  $\text{CDCl}_3$ ) titration data. Representative binding curves for hosts **2a-f** with **5**.

## Calculated Geometries

### Diethyl barbital

Sum of electronic and zero point energies: -646.9674167 Hartree

Lowest Frequency: 34.7 cm<sup>-1</sup>

Coordinates: B3LYP/6-31+G(d,p) IEF-PCM CHCl<sub>3</sub>

| Atom | x           | y           | z           |
|------|-------------|-------------|-------------|
| H    | -1.89457700 | -0.00259900 | 2.03104700  |
| N    | -1.35841700 | -0.00201400 | 1.16878100  |
| C    | 0.02232300  | 0.00064400  | 1.28614000  |
| C    | -2.10319000 | -0.00487900 | -0.00003300 |
| C    | 0.85119500  | 0.00210000  | -0.00003900 |
| O    | 0.53956400  | 0.00187000  | 2.39282700  |
| N    | -1.35862900 | -0.00469900 | -1.16871700 |
| O    | -3.32340900 | -0.00755700 | 0.00019500  |
| C    | 0.02233300  | -0.00203200 | -1.28621000 |
| C    | 1.75570700  | 1.27587500  | -0.00135800 |
| C    | 1.76530700  | -1.26462000 | 0.00120400  |
| H    | -1.89473100 | -0.00704800 | -2.03094200 |
| O    | 0.53928700  | -0.00241500 | -2.39292900 |
| H    | 2.39809200  | 1.20683800  | 0.88129000  |
| H    | 2.39754800  | 1.20545700  | -0.88428700 |
| H    | 2.40713700  | -1.19093600 | -0.88147500 |
| H    | 2.40675900  | -1.18942600 | 0.88403600  |
| C    | 1.00972200  | 2.61449100  | -0.00214600 |
| H    | 1.72948100  | 3.43846400  | -0.00266000 |
| H    | 0.37831000  | 2.73235400  | -0.88964500 |
| H    | 0.37836200  | 2.73336000  | 0.88524600  |
| C    | 1.02934200  | -2.60881600 | 0.00222700  |
| H    | 0.39910900  | -2.73268500 | -0.88527600 |
| H    | 1.75519700  | -3.42742700 | 0.00312200  |
| H    | 0.39867000  | -2.73112200 | 0.88963900  |

### 2a

Sum of electronic and zero point energies: -1013.047193 Hartree

Lowest Frequency: 20.7 cm<sup>-1</sup>

Coordinates: B3LYP/6-31+G(d,p) IEF-PCM CHCl<sub>3</sub>

| Atom | x         | y         | z         |
|------|-----------|-----------|-----------|
| N    | 0.045100  | 0.412300  | -0.263000 |
| C    | -1.053800 | 1.152000  | -0.060000 |
| C    | 1.237000  | 1.023200  | -0.312200 |
| C    | -1.019500 | 2.543700  | 0.106900  |
| N    | -2.226300 | 0.378800  | -0.041700 |
| C    | 1.392300  | 2.408800  | -0.160600 |
| N    | 2.295500  | 0.126600  | -0.532200 |
| C    | 0.232900  | 3.153800  | 0.050000  |
| H    | -1.929100 | 3.100400  | 0.273300  |
| C    | -3.528600 | 0.773500  | 0.161300  |
| H    | -2.042100 | -0.609500 | -0.156300 |
| H    | 2.371700  | 2.860000  | -0.208600 |

|   |           |           |           |
|---|-----------|-----------|-----------|
| C | 3.645100  | 0.374300  | -0.662600 |
| H | 1.985300  | -0.834000 | -0.607400 |
| H | 0.306600  | 4.230100  | 0.173100  |
| O | -3.845800 | 1.934200  | 0.427900  |
| C | -4.555600 | -0.317200 | 0.051100  |
| O | 4.125800  | 1.505900  | -0.601100 |
| C | 4.497200  | -0.865600 | -0.892400 |
| C | -5.765300 | -0.138600 | 0.740600  |
| C | -4.372000 | -1.474400 | -0.723600 |
| H | 3.866700  | -1.701500 | -1.216500 |
| H | 5.174700  | -0.628300 | -1.719700 |
| C | -6.764000 | -1.109900 | 0.676800  |
| H | -5.906500 | 0.764200  | 1.324900  |
| C | -5.377900 | -2.440700 | -0.794800 |
| H | -3.465800 | -1.619800 | -1.304300 |
| C | -6.572200 | -2.264100 | -0.090400 |
| H | -7.691300 | -0.966700 | 1.223100  |
| H | -5.230500 | -3.325500 | -1.406500 |
| H | -7.351600 | -3.018300 | -0.144100 |
| C | 5.347400  | -1.331200 | 0.332700  |
| C | 4.440900  | -1.591900 | 1.551600  |
| H | 3.949700  | -0.675300 | 1.896300  |
| H | 3.662300  | -2.328900 | 1.321100  |
| H | 5.031500  | -1.983800 | 2.387100  |
| C | 6.044300  | -2.645800 | -0.073000 |
| H | 6.683200  | -2.501000 | -0.951900 |
| H | 6.675800  | -3.012400 | 0.744200  |
| H | 5.313700  | -3.428100 | -0.310100 |
| C | 6.417500  | -0.283100 | 0.693500  |
| H | 7.089000  | -0.098900 | -0.152900 |
| H | 5.968600  | 0.672600  | 0.975900  |
| H | 7.024300  | -0.640800 | 1.533400  |

## 2b

Sum of electronic and zero point energies: -1472.650801 Hartree

Lowest Frequency: 14.0 cm<sup>-1</sup>

Coordinates: B3LYP/6-31+G(d,p) IEF-PCM CHCl<sub>3</sub>

| Atom | x         | y         | z         |
|------|-----------|-----------|-----------|
| N    | 0.829900  | 0.634000  | -0.285200 |
| C    | -0.173800 | 1.497100  | -0.077900 |
| C    | 2.084200  | 1.102300  | -0.342800 |
| C    | 0.021600  | 2.875700  | 0.083900  |
| N    | -1.428800 | 0.864800  | -0.051800 |
| C    | 2.399300  | 2.461600  | -0.198800 |
| N    | 3.031700  | 0.089300  | -0.561700 |
| C    | 1.335900  | 3.336700  | 0.016000  |
| H    | -0.815700 | 3.534800  | 0.255900  |
| C    | -2.669400 | 1.404200  | 0.193000  |
| H    | -1.360900 | -0.136900 | -0.178300 |
| H    | 3.424000  | 2.796300  | -0.255200 |

|    |           |           |           |
|----|-----------|-----------|-----------|
| C  | 4.401500  | 0.180300  | -0.688800 |
| H  | 2.614100  | -0.830200 | -0.629300 |
| H  | 1.534500  | 4.397600  | 0.134000  |
| O  | -2.846300 | 2.587400  | 0.487400  |
| C  | -3.819500 | 0.443800  | 0.092100  |
| O  | 5.007700  | 1.250300  | -0.634100 |
| C  | 5.109900  | -1.149200 | -0.904300 |
| C  | -4.980300 | 0.745600  | 0.819900  |
| C  | -3.799100 | -0.706500 | -0.711800 |
| H  | 4.405000  | -1.894600 | -1.290700 |
| H  | 5.861100  | -0.974900 | -1.681700 |
| C  | -6.092600 | -0.091500 | 0.770700  |
| H  | -5.001200 | 1.642800  | 1.428700  |
| C  | -4.910100 | -1.547900 | -0.779800 |
| H  | -2.935300 | -0.947400 | -1.323700 |
| C  | -6.044600 | -1.233900 | -0.030900 |
| H  | -6.983600 | 0.139300  | 1.343800  |
| H  | -4.895600 | -2.428600 | -1.411900 |
| C  | 5.822400  | -1.744500 | 0.352700  |
| C  | 4.810000  | -1.978000 | 1.491000  |
| H  | 4.373400  | -1.038700 | 1.847100  |
| H  | 3.991900  | -2.633800 | 1.169100  |
| H  | 5.302300  | -2.457100 | 2.344400  |
| C  | 6.429500  | -3.097700 | -0.070700 |
| H  | 7.142800  | -2.972700 | -0.893500 |
| H  | 6.963200  | -3.557000 | 0.769000  |
| H  | 5.653000  | -3.798700 | -0.398800 |
| C  | 6.950200  | -0.815500 | 0.840800  |
| H  | 7.691600  | -0.646700 | 0.051600  |
| H  | 6.567200  | 0.160500  | 1.150600  |
| H  | 7.464500  | -1.269300 | 1.695800  |
| Cl | -7.445200 | -2.294000 | -0.105200 |

## 2c

Sum of electronic and zero point energies: -1105.294665 Hartree

Lowest Frequency: 17.0 cm<sup>-1</sup>

Coordinates: B3LYP/6-31+G(d,p) IEF-PCM CHCl<sub>3</sub>

| Atom | x         | y         | z         |
|------|-----------|-----------|-----------|
| N    | 0.669300  | 0.600100  | -0.287200 |
| C    | -0.342000 | 1.453400  | -0.079800 |
| C    | 1.918600  | 1.081400  | -0.347200 |
| C    | -0.162600 | 2.833700  | 0.080100  |
| N    | -1.591900 | 0.807800  | -0.053500 |
| C    | 2.218600  | 2.444800  | -0.205700 |
| N    | 2.877000  | 0.079200  | -0.564600 |
| C    | 1.146800  | 3.308900  | 0.009700  |
| H    | -1.006400 | 3.484500  | 0.252000  |
| C    | -2.833700 | 1.334700  | 0.197700  |
| H    | -1.515000 | -0.193300 | -0.182700 |
| H    | 3.239600  | 2.790300  | -0.264400 |

|   |           |           |           |
|---|-----------|-----------|-----------|
| C | 4.245900  | 0.186600  | -0.695000 |
| H | 2.470900  | -0.845900 | -0.627200 |
| H | 1.334300  | 4.372000  | 0.125900  |
| O | -3.029500 | 2.512500  | 0.497200  |
| C | -3.976100 | 0.359300  | 0.094200  |
| O | 4.837800  | 1.264800  | -0.649700 |
| C | 4.970300  | -1.135600 | -0.900800 |
| C | -3.961900 | -0.746300 | -0.770400 |
| C | -5.112800 | 0.610200  | 0.877400  |
| H | 4.272700  | -1.894700 | -1.273400 |
| H | 5.713800  | -0.960900 | -1.685500 |
| C | -5.060000 | -1.599700 | -0.842100 |
| H | -3.113600 | -0.934900 | -1.420600 |
| C | -6.210300 | -0.241800 | 0.823900  |
| H | -5.123500 | 1.477300  | 1.528100  |
| C | -6.185600 | -1.353200 | -0.038000 |
| H | -5.051600 | -2.446800 | -1.519000 |
| H | -7.082500 | -0.053100 | 1.440100  |
| C | 5.698600  | -1.706900 | 0.358300  |
| C | 4.698200  | -1.930700 | 1.509100  |
| H | 4.257800  | -0.989200 | 1.854900  |
| H | 3.882000  | -2.597100 | 1.204900  |
| H | 5.202000  | -2.392900 | 2.365100  |
| C | 6.312100  | -3.061600 | -0.050800 |
| H | 7.015800  | -2.943500 | -0.882900 |
| H | 6.858300  | -3.503600 | 0.790100  |
| H | 5.537900  | -3.773700 | -0.359800 |
| C | 6.823900  | -0.762700 | 0.822700  |
| H | 7.556800  | -0.599900 | 0.024300  |
| H | 6.436300  | 0.214800  | 1.122100  |
| H | 7.349000  | -1.200600 | 1.679200  |
| C | -7.315400 | -2.235800 | -0.101700 |
| N | -8.231000 | -2.952900 | -0.151800 |

## 2d

Sum of electronic and zero point energies: -1217.554891 Hartree

Lowest Frequency: 14.9 cm<sup>-1</sup>

Coordinates: B3LYP/6-31+G(d,p) IEF-PCM CHCl<sub>3</sub>

| Atom | x         | y         | z         |
|------|-----------|-----------|-----------|
| N    | 1.089300  | 0.666300  | -0.287500 |
| C    | 0.114500  | 1.565000  | -0.099600 |
| C    | 2.357600  | 1.094100  | -0.354900 |
| C    | 0.349900  | 2.939600  | 0.032700  |
| N    | -1.161700 | 0.972100  | -0.062700 |
| C    | 2.713200  | 2.446700  | -0.239800 |
| N    | 3.274300  | 0.049500  | -0.550900 |
| C    | 1.678100  | 3.358600  | -0.044100 |
| H    | -0.466600 | 3.628000  | 0.189100  |
| C    | -2.379900 | 1.556700  | 0.170100  |
| H    | -1.126200 | -0.034000 | -0.171000 |



|   |           |           |           |
|---|-----------|-----------|-----------|
| H | 3.747500  | 2.748800  | -0.303000 |
| C | 4.646000  | 0.100500  | -0.688300 |
| H | 2.831200  | -0.859600 | -0.596000 |
| H | 1.909500  | 4.415100  | 0.051100  |
| O | -2.530300 | 2.748600  | 0.437300  |
| C | -3.563200 | 0.627400  | 0.088500  |
| O | 5.279800  | 1.155200  | -0.665400 |
| C | 5.317900  | -1.252100 | -0.872400 |
| C | -4.682000 | 0.937800  | 0.876700  |
| C | -3.601300 | -0.487400 | -0.764000 |
| H | 4.588100  | -1.993400 | -1.218200 |
| H | 6.056300  | -1.122900 | -1.670700 |
| C | -5.817600 | 0.135400  | 0.840400  |
| H | -4.650400 | 1.812000  | 1.516700  |
| C | -4.735700 | -1.294300 | -0.819700 |
| H | -2.766100 | -0.720000 | -1.416400 |
| C | -5.824100 | -0.972200 | -0.009400 |
| H | -6.682700 | 0.357000  | 1.452100  |
| H | -4.783000 | -2.150500 | -1.480200 |
| C | 6.041900  | -1.821000 | 0.390200  |
| C | 5.047300  | -1.987200 | 1.555600  |
| H | 4.641800  | -1.024600 | 1.885600  |
| H | 4.206000  | -2.632000 | 1.274000  |
| H | 5.544600  | -2.447800 | 2.416200  |
| C | 6.606000  | -3.203300 | 0.002700  |
| H | 7.308700  | -3.123600 | -0.834800 |
| H | 7.141900  | -3.648500 | 0.848500  |
| H | 5.806600  | -3.894200 | -0.289800 |
| C | 7.203100  | -0.906000 | 0.823200  |
| H | 7.930800  | -0.782600 | 0.013200  |
| H | 6.851500  | 0.089000  | 1.108700  |
| H | 7.724100  | -1.345400 | 1.681500  |
| N | -7.021900 | -1.824600 | -0.058700 |
| O | -7.008100 | -2.801600 | -0.811600 |
| O | -7.979300 | -1.520100 | 0.656400  |

## 2e

Sum of electronic and zero point energies: -1052.34178 Hartree

Lowest Frequency: 15.5 cm<sup>-1</sup>

Coordinates: B3LYP/6-31+G(d,p) IEF-PCM CHCl<sub>3</sub>

| Atom | x         | y        | z         |
|------|-----------|----------|-----------|
| N    | 0.457100  | 0.549600 | -0.284800 |
| C    | -0.588400 | 1.361000 | -0.072800 |
| C    | 1.687000  | 1.079000 | -0.340300 |
| C    | -0.458500 | 2.747200 | 0.095500  |
| N    | -1.810000 | 0.669800 | -0.047700 |
| C    | 1.936600  | 2.450700 | -0.189400 |
| N    | 2.682100  | 0.113100 | -0.563900 |
| C    | 0.831400  | 3.271800 | 0.030000  |
| H    | -1.327300 | 3.363400 | 0.270700  |

|   |           |           |           |
|---|-----------|-----------|-----------|
| C | -3.079200 | 1.147800  | 0.191900  |
| H | -1.695600 | -0.327100 | -0.177100 |
| H | 2.944000  | 2.834500  | -0.243700 |
| C | 4.045900  | 0.268200  | -0.688300 |
| H | 2.308400  | -0.824800 | -0.635700 |
| H | 0.978100  | 4.340600  | 0.153500  |
| O | -3.308400 | 2.322400  | 0.488700  |
| C | -4.178000 | 0.134000  | 0.082000  |
| O | 4.601800  | 1.365200  | -0.631400 |
| C | 4.814800  | -1.027500 | -0.903100 |
| C | -5.368200 | 0.380600  | 0.786000  |
| C | -4.090300 | -1.023900 | -0.705200 |
| H | 4.141200  | -1.809400 | -1.272400 |
| H | 5.546400  | -0.826100 | -1.692600 |
| C | -6.428600 | -0.517900 | 0.720600  |
| H | -5.444900 | 1.280800  | 1.386300  |
| C | -5.162900 | -1.915300 | -0.774600 |
| H | -3.205100 | -1.230000 | -1.300000 |
| C | -6.347200 | -1.683600 | -0.061200 |
| H | -7.336000 | -0.313700 | 1.283300  |
| H | -5.078300 | -2.799900 | -1.399900 |
| C | 5.570500  | -1.576200 | 0.349700  |
| C | 4.588300  | -1.820700 | 1.511900  |
| H | 4.127200  | -0.889200 | 1.858000  |
| H | 3.786100  | -2.509200 | 1.219700  |
| H | 5.113000  | -2.265500 | 2.364600  |
| C | 6.213400  | -2.916500 | -0.061400 |
| H | 6.903600  | -2.784200 | -0.902600 |
| H | 6.780800  | -3.341200 | 0.774400  |
| H | 5.453600  | -3.649100 | -0.358200 |
| C | 6.676700  | -0.602400 | 0.799000  |
| H | 7.396900  | -0.424600 | -0.007700 |
| H | 6.267500  | 0.365900  | 1.098900  |
| H | 7.221400  | -1.023900 | 1.651600  |
| C | -7.509600 | -2.643800 | -0.136000 |
| H | -7.817700 | -2.969300 | 0.863800  |
| H | -8.380700 | -2.169000 | -0.602600 |
| H | -7.257600 | -3.532400 | -0.720600 |

## 2f

Sum of electronic and zero point energies: -1127.547005 Hartree

Lowest Frequency: 12.4 cm<sup>-1</sup>

Coordinates: B3LYP/6-31+G(d,p) IEF-PCM CHCl<sub>3</sub>

| Atom | x         | y        | z         |
|------|-----------|----------|-----------|
| N    | 0.860900  | 0.609600 | -0.281000 |
| C    | -0.156000 | 1.457000 | -0.068900 |
| C    | 2.110300  | 1.093000 | -0.318400 |
| C    | 0.025000  | 2.835400 | 0.118600  |
| N    | -1.402400 | 0.812300 | -0.066600 |
| C    | 2.410000  | 2.452200 | -0.147800 |

|   |           |           |           |
|---|-----------|-----------|-----------|
| N | 3.070800  | 0.093400  | -0.546500 |
| C | 1.334200  | 3.311500  | 0.071800  |
| H | -0.821500 | 3.481700  | 0.293600  |
| C | -2.656400 | 1.336000  | 0.165900  |
| H | -1.322000 | -0.185600 | -0.210800 |
| H | 3.431500  | 2.798600  | -0.188500 |
| C | 4.439800  | 0.200500  | -0.663600 |
| H | 2.663100  | -0.828900 | -0.633700 |
| H | 1.519800  | 4.372400  | 0.210400  |
| O | -2.837500 | 2.515700  | 0.479100  |
| C | -3.793200 | 0.374500  | 0.028300  |
| O | 5.035300  | 1.275400  | -0.585800 |
| C | 5.162400  | -1.118000 | -0.900000 |
| C | -3.732400 | -0.816900 | -0.720900 |
| C | -4.999000 | 0.697700  | 0.665200  |
| H | 4.462700  | -1.867800 | -1.287000 |
| H | 5.903900  | -0.927500 | -1.683000 |
| C | -4.834700 | -1.655400 | -0.816300 |
| H | -2.835600 | -1.089400 | -1.269200 |
| C | -6.111700 | -0.138800 | 0.586400  |
| H | -5.057900 | 1.619500  | 1.233700  |
| C | -6.032300 | -1.326000 | -0.158000 |
| H | -4.793500 | -2.566100 | -1.404600 |
| H | -7.023000 | 0.140000  | 1.100700  |
| C | 5.893700  | -1.717500 | 0.343900  |
| C | 4.897900  | -1.955800 | 1.495800  |
| H | 4.466400  | -1.017700 | 1.861600  |
| H | 4.074900  | -2.609900 | 1.183400  |
| H | 5.402600  | -2.438100 | 2.340200  |
| C | 6.495700  | -3.068600 | -0.093500 |
| H | 7.195100  | -2.940000 | -0.927600 |
| H | 7.043800  | -3.529800 | 0.735800  |
| H | 5.714800  | -3.769600 | -0.411200 |
| C | 7.028100  | -0.789800 | 0.819100  |
| H | 7.759100  | -0.620000 | 0.020300  |
| H | 6.649000  | 0.185700  | 1.135300  |
| H | 7.553400  | -1.245400 | 1.666300  |
| O | -7.052900 | -2.211600 | -0.306700 |
| C | -8.307400 | -1.931800 | 0.322600  |
| H | -8.958900 | -2.765300 | 0.061600  |
| H | -8.198600 | -1.878200 | 1.411300  |
| H | -8.737600 | -0.997600 | -0.054800 |

### 2a-Barbital

Sum of electronic and zero point energies: -1660.226464 Hartree

Lowest Frequency: 8.7 cm<sup>-1</sup>

Coordinates: B3LYP/6-31+G(d,p) IEF-PCM CHCl<sub>3</sub>

| Atom | x         | y        | z         |
|------|-----------|----------|-----------|
| N    | -0.595500 | 1.673200 | -0.307100 |
| C    | 0.378700  | 2.601900 | -0.311000 |

|   |           |           |           |
|---|-----------|-----------|-----------|
| C | -1.873000 | 2.075800  | -0.478600 |
| C | 0.124500  | 3.967800  | -0.488100 |
| N | 1.690000  | 2.106500  | -0.175500 |
| C | -2.223400 | 3.419100  | -0.669300 |
| N | -2.822800 | 1.044000  | -0.410300 |
| C | -1.197100 | 4.360000  | -0.670400 |
| H | 0.935100  | 4.681300  | -0.481000 |
| C | 2.746200  | 2.785800  | 0.399200  |
| H | 1.834200  | 1.130300  | -0.438300 |
| H | -3.256900 | 3.695200  | -0.810300 |
| C | -4.144200 | 1.078800  | -0.811800 |
| H | -2.496300 | 0.170700  | 0.002400  |
| H | -1.431900 | 5.410100  | -0.815300 |
| O | 2.615300  | 3.871900  | 0.966800  |
| C | 4.087400  | 2.122000  | 0.301600  |
| O | -4.658100 | 2.059300  | -1.351800 |
| C | -4.924900 | -0.198400 | -0.542300 |
| C | 4.473000  | 1.350300  | -0.804700 |
| C | 5.006700  | 2.350900  | 1.338100  |
| H | -5.481200 | -0.420500 | -1.459600 |
| H | -4.237200 | -1.029000 | -0.357800 |
| C | 5.759700  | 0.809500  | -0.867400 |
| H | 3.784000  | 1.183200  | -1.625200 |
| C | 6.284100  | 1.795100  | 1.281300  |
| H | 4.706700  | 2.965500  | 2.180300  |
| C | 6.663900  | 1.024100  | 0.176300  |
| H | 6.054900  | 0.224500  | -1.733300 |
| H | 6.984700  | 1.967000  | 2.092900  |
| H | 7.662000  | 0.598700  | 0.127100  |
| C | -5.938200 | -0.121900 | 0.645800  |
| C | -7.069500 | 0.880700  | 0.349400  |
| H | -6.686300 | 1.896000  | 0.218500  |
| H | -7.609300 | 0.607600  | -0.564800 |
| H | -7.789000 | 0.887900  | 1.176500  |
| C | -6.545100 | -1.530200 | 0.812100  |
| H | -5.774600 | -2.269800 | 1.058900  |
| H | -7.286900 | -1.534300 | 1.619000  |
| H | -7.047300 | -1.855900 | -0.106400 |
| C | -5.216500 | 0.276200  | 1.948400  |
| H | -4.394100 | -0.411800 | 2.174200  |
| H | -4.804700 | 1.289900  | 1.890100  |
| H | -5.916300 | 0.253200  | 2.791400  |
| H | -0.166000 | -0.228000 | -0.123700 |
| N | 0.065700  | -1.237900 | -0.033300 |
| C | 1.324400  | -1.638600 | -0.422200 |
| C | -0.928000 | -2.050400 | 0.467900  |
| C | 1.703200  | -3.113400 | -0.296000 |
| O | 2.116800  | -0.808500 | -0.857700 |
| N | -0.608400 | -3.386300 | 0.609700  |
| O | -2.035100 | -1.613500 | 0.767100  |
| C | 0.593500  | -3.995600 | 0.277900  |

|   |           |           |           |
|---|-----------|-----------|-----------|
| C | 2.080300  | -3.652800 | -1.713000 |
| C | 2.953100  | -3.224000 | 0.635200  |
| H | -1.342700 | -3.981700 | 0.980500  |
| O | 0.733900  | -5.196100 | 0.445800  |
| H | 2.930700  | -3.058600 | -2.059500 |
| H | 2.428500  | -4.680400 | -1.575100 |
| C | 0.955400  | -3.615900 | -2.753000 |
| H | 3.246900  | -4.277600 | 0.642100  |
| H | 3.755700  | -2.658800 | 0.153300  |
| C | 2.751500  | -2.726300 | 2.070600  |
| H | 1.319200  | -4.014100 | -3.704800 |
| H | 0.097200  | -4.226300 | -2.451300 |
| H | 0.601900  | -2.596000 | -2.940100 |
| H | 3.680600  | -2.845500 | 2.635700  |
| H | 2.484500  | -1.664500 | 2.103700  |
| H | 1.974800  | -3.291700 | 2.597100  |

### 2b-barbital

Sum of electronic and zero point energies: -2119.83084 Hartree

Lowest Frequency: 6.8 cm<sup>-1</sup>

Coordinates: B3LYP/6-31+G(d,p) IEF-PCM CHCl<sub>3</sub>

| Atom | x         | y         | z         |
|------|-----------|-----------|-----------|
| N    | -1.051700 | -1.670500 | 0.309300  |
| C    | -0.065800 | -2.586700 | 0.313500  |
| C    | -2.324400 | -2.090400 | 0.475700  |
| C    | -0.301500 | -3.956100 | 0.485800  |
| N    | 1.239400  | -2.072000 | 0.183700  |
| C    | -2.657100 | -3.439300 | 0.660700  |
| N    | -3.287500 | -1.071500 | 0.409300  |
| C    | -1.618700 | -4.366400 | 0.662200  |
| H    | 0.518300  | -4.658900 | 0.479400  |
| C    | 2.307700  | -2.736500 | -0.382500 |
| H    | 1.366200  | -1.091900 | 0.442300  |
| H    | -3.687300 | -3.729600 | 0.797300  |
| C    | -4.610700 | -1.127000 | 0.803800  |
| H    | -2.971200 | -0.190700 | 0.004800  |
| H    | -1.840000 | -5.419900 | 0.802800  |
| O    | 2.201200  | -3.826600 | -0.946900 |
| C    | 3.638500  | -2.052100 | -0.280500 |
| O    | -5.113700 | -2.118200 | 1.334100  |
| C    | -5.407100 | 0.141500  | 0.539400  |
| C    | 4.006200  | -1.257300 | 0.814300  |
| C    | 4.572000  | -2.285200 | -1.302300 |
| H    | -5.971200 | 0.349400  | 1.455300  |
| H    | -4.729700 | 0.982500  | 0.364600  |
| C    | 5.281900  | -0.695400 | 0.886900  |
| H    | 3.312100  | -1.081100 | 1.628000  |
| C    | 5.842300  | -1.716100 | -1.251300 |
| H    | 4.293200  | -2.917300 | -2.138400 |
| C    | 6.183700  | -0.925300 | -0.151600 |

|    |           |           |           |
|----|-----------|-----------|-----------|
| H  | 5.569400  | -0.091300 | 1.740000  |
| H  | 6.558000  | -1.887100 | -2.047600 |
| C  | -6.413200 | 0.059700  | -0.654600 |
| C  | -7.533700 | -0.958200 | -0.369600 |
| H  | -7.138900 | -1.969400 | -0.242200 |
| H  | -8.081600 | -0.696600 | 0.543100  |
| H  | -8.248800 | -0.969600 | -1.200600 |
| C  | -7.036100 | 1.461600  | -0.815900 |
| H  | -6.273500 | 2.211500  | -1.055400 |
| H  | -7.774300 | 1.461200  | -1.626000 |
| H  | -7.546200 | 1.776300  | 0.102100  |
| C  | -5.679800 | -0.321900 | -1.955600 |
| H  | -4.864800 | 0.377400  | -2.173000 |
| H  | -5.256000 | -1.330900 | -1.901100 |
| H  | -6.375400 | -0.302600 | -2.802100 |
| Cl | 7.789900  | -0.210900 | -0.071200 |
| H  | -0.645700 | 0.239400  | 0.128700  |
| N  | -0.425400 | 1.251800  | 0.040100  |
| C  | 0.831800  | 1.664600  | 0.419300  |
| C  | -1.431800 | 2.055300  | -0.451600 |
| C  | 1.193800  | 3.143400  | 0.296100  |
| O  | 1.637200  | 0.840700  | 0.844100  |
| N  | -1.128300 | 3.395000  | -0.589500 |
| O  | -2.535100 | 1.606200  | -0.745800 |
| C  | 0.069100  | 4.016200  | -0.263000 |
| C  | 1.580300  | 3.680700  | 1.711400  |
| C  | 2.432700  | 3.271600  | -0.647800 |
| H  | -1.872000 | 3.984000  | -0.951800 |
| O  | 0.194500  | 5.219100  | -0.424800 |
| H  | 2.442900  | 3.096700  | 2.044600  |
| H  | 1.912700  | 4.713600  | 1.574700  |
| C  | 0.468700  | 3.623000  | 2.764800  |
| H  | 2.714500  | 4.328400  | -0.653400 |
| H  | 3.246900  | 2.714000  | -0.176300 |
| C  | 2.221900  | 2.777400  | -2.083000 |
| H  | 0.838900  | 4.021400  | 3.714100  |
| H  | -0.401500 | 4.223100  | 2.477100  |
| H  | 0.131600  | 2.597500  | 2.951100  |
| H  | 3.144000  | 2.908700  | -2.656800 |
| H  | 1.965400  | 1.713000  | -2.118000 |
| H  | 1.434200  | 3.336800  | -2.599500 |

### 2c-barbital

Sum of electronic and zero point energies: -1752.474457 Hartree

Lowest Frequency: 7.0 cm<sup>-1</sup>

Coordinates: B3LYP/6-31+G(d,p) IEF-PCM CHCl<sub>3</sub>

| Atom | x         | y         | z        |
|------|-----------|-----------|----------|
| N    | -0.973200 | -1.674800 | 0.307200 |
| C    | -0.001500 | -2.605600 | 0.320800 |
| C    | -2.252000 | -2.074800 | 0.473900 |

|   |           |           |           |
|---|-----------|-----------|-----------|
| C | -0.255700 | -3.969800 | 0.502600  |
| N | 1.311500  | -2.107900 | 0.188400  |
| C | -2.604000 | -3.418100 | 0.668000  |
| N | -3.200600 | -1.043500 | 0.399600  |
| C | -1.579600 | -4.359800 | 0.678900  |
| H | 0.554000  | -4.684200 | 0.503500  |
| C | 2.373400  | -2.792400 | -0.357500 |
| H | 1.448600  | -1.125100 | 0.433600  |
| H | -3.638500 | -3.692600 | 0.804400  |
| C | -4.525800 | -1.079500 | 0.791800  |
| H | -2.870600 | -0.167300 | -0.004000 |
| H | -1.816300 | -5.409000 | 0.826500  |
| O | 2.272900  | -3.899200 | -0.887600 |
| C | 3.709800  | -2.106300 | -0.278400 |
| O | -5.042700 | -2.061900 | 1.324700  |
| C | -5.304900 | 0.198000  | 0.520600  |
| C | 4.095000  | -1.324200 | 0.819700  |
| C | 4.619000  | -2.332500 | -1.323600 |
| H | -5.868100 | 0.416600  | 1.434400  |
| H | -4.616300 | 1.029500  | 0.343800  |
| C | 5.369500  | -0.764400 | 0.871300  |
| H | 3.413300  | -1.158600 | 1.645500  |
| C | 5.887100  | -1.764100 | -1.291700 |
| H | 4.320500  | -2.958000 | -2.157500 |
| C | 6.266400  | -0.976500 | -0.189000 |
| H | 5.671200  | -0.168600 | 1.725700  |
| H | 6.584400  | -1.928400 | -2.105900 |
| C | -6.309400 | 0.124100  | -0.675300 |
| C | -7.442500 | -0.879600 | -0.389700 |
| H | -7.059900 | -1.895100 | -0.258100 |
| H | -7.989400 | -0.608600 | 0.520800  |
| H | -8.155500 | -0.885400 | -1.222300 |
| C | -6.915300 | 1.532700  | -0.842300 |
| H | -6.143400 | 2.273100  | -1.081800 |
| H | -7.651500 | 1.538700  | -1.654300 |
| H | -7.424100 | 1.856000  | 0.073500  |
| C | -5.577700 | -0.270200 | -1.973500 |
| H | -4.753200 | 0.418100  | -2.190500 |
| H | -5.167000 | -1.284500 | -1.915400 |
| H | -6.270700 | -0.244100 | -2.821800 |
| C | 7.576000  | -0.391400 | -0.144700 |
| N | 8.637400  | 0.085800  | -0.110400 |
| H | -0.538100 | 0.234100  | 0.115400  |
| N | -0.303400 | 1.243100  | 0.033800  |
| C | 0.961300  | 1.634200  | 0.409500  |
| C | -1.301800 | 2.065500  | -0.444000 |
| C | 1.338900  | 3.110700  | 0.311900  |
| O | 1.760100  | 0.793400  | 0.814300  |
| N | -0.981300 | 3.402300  | -0.567500 |
| O | -2.411500 | 1.633200  | -0.738700 |
| C | 0.225400  | 4.004000  | -0.237500 |

|   |           |          |           |
|---|-----------|----------|-----------|
| C | 1.720400  | 3.620200 | 1.739300  |
| C | 2.584300  | 3.243100 | -0.621900 |
| H | -1.718000 | 4.005200 | -0.921200 |
| O | 0.366700  | 5.206500 | -0.387000 |
| H | 2.577600  | 3.025100 | 2.067300  |
| H | 2.060200  | 4.653200 | 1.622400  |
| C | 0.602500  | 3.551100 | 2.785300  |
| H | 2.876200  | 4.297100 | -0.608500 |
| H | 3.390700  | 2.670400 | -0.155500 |
| C | 2.376300  | 2.774800 | -2.066300 |
| H | 0.969700  | 3.931500 | 3.743100  |
| H | -0.262900 | 4.160800 | 2.503500  |
| H | 0.258600  | 2.524600 | 2.952700  |
| H | 3.302400  | 2.906700 | -2.633500 |
| H | 2.109200  | 1.713700 | -2.120300 |
| H | 1.596700  | 3.350400 | -2.577100 |

### 2d-barbital

Sum of electronic and zero point energies: -1864.735918 Hartree

Lowest Frequency: 3.7 cm<sup>-1</sup>

Coordinates: B3LYP/6-31+G(d,p) IEF-PCM CHCl<sub>3</sub>

| Atom | x         | y         | z         |
|------|-----------|-----------|-----------|
| N    | -1.234000 | -1.681600 | 0.299200  |
| C    | -0.258500 | -2.608900 | 0.302500  |
| C    | -2.511500 | -2.089400 | 0.455800  |
| C    | -0.507300 | -3.976800 | 0.462100  |
| N    | 1.052300  | -2.101300 | 0.183500  |
| C    | -2.858500 | -3.437300 | 0.627500  |
| N    | -3.464800 | -1.061600 | 0.396700  |
| C    | -1.830500 | -4.374700 | 0.627200  |
| H    | 0.305100  | -4.687800 | 0.454900  |
| C    | 2.128900  | -2.777900 | -0.340000 |
| H    | 1.178400  | -1.116000 | 0.426100  |
| H    | -3.892300 | -3.718100 | 0.756200  |
| C    | -4.788900 | -1.109100 | 0.792000  |
| H    | -3.139600 | -0.177700 | 0.006300  |
| H    | -2.063400 | -5.427000 | 0.757200  |
| O    | 2.055100  | -3.891600 | -0.859100 |
| C    | 3.455600  | -2.071900 | -0.248900 |
| O    | -5.300500 | -2.102000 | 1.310100  |
| C    | -5.573100 | 0.170100  | 0.544600  |
| C    | 3.823800  | -1.301100 | 0.863200  |
| C    | 4.371200  | -2.270200 | -1.294700 |
| H    | -6.132700 | 0.372400  | 1.464500  |
| H    | -4.887900 | 1.006400  | 0.378200  |
| C    | 5.089200  | -0.721500 | 0.929400  |
| H    | 3.136000  | -1.158300 | 1.688000  |
| C    | 5.631400  | -1.683700 | -1.250900 |
| H    | 4.086100  | -2.887700 | -2.138800 |
| C    | 5.969700  | -0.915900 | -0.134200 |



|   |           |           |           |
|---|-----------|-----------|-----------|
| H | 5.391400  | -0.132000 | 1.785500  |
| H | 6.342900  | -1.817300 | -2.055700 |
| C | -6.583100 | 0.112400  | -0.647500 |
| C | -7.712400 | -0.898500 | -0.372200 |
| H | -7.326900 | -1.915000 | -0.258400 |
| H | -8.255500 | -0.643200 | 0.545100  |
| H | -8.429600 | -0.893000 | -1.201300 |
| C | -7.193200 | 1.521900  | -0.789500 |
| H | -6.424100 | 2.267700  | -1.021200 |
| H | -7.933300 | 1.538800  | -1.597700 |
| H | -7.698100 | 1.829700  | 0.133700  |
| C | -5.856700 | -0.259600 | -1.955200 |
| H | -5.034500 | 0.433800  | -2.164700 |
| H | -5.444000 | -1.273900 | -1.915400 |
| H | -6.553700 | -0.221000 | -2.799800 |
| N | 7.301200  | -0.295200 | -0.074900 |
| O | 8.071000  | -0.480600 | -1.020900 |
| O | 7.582700  | 0.382900  | 0.916900  |
| H | -0.809100 | 0.235700  | 0.113400  |
| N | -0.578400 | 1.245000  | 0.028000  |
| C | 0.690700  | 1.639400  | 0.384400  |
| C | -1.584600 | 2.063900  | -0.439400 |
| C | 1.062900  | 3.116800  | 0.280800  |
| O | 1.497100  | 0.800800  | 0.778800  |
| N | -1.268200 | 3.400600  | -0.572400 |
| O | -2.697100 | 1.628200  | -0.718100 |
| C | -0.057300 | 4.005100  | -0.263200 |
| C | 1.449100  | 3.630400  | 1.706000  |
| C | 2.303000  | 3.252600  | -0.658900 |
| H | -2.010000 | 4.000700  | -0.920000 |
| O | 0.081400  | 5.206500  | -0.423400 |
| H | 2.308200  | 3.037100  | 2.032000  |
| H | 1.787300  | 4.663400  | 1.585100  |
| C | 0.335000  | 3.563000  | 2.756200  |
| H | 2.590100  | 4.307900  | -0.649500 |
| H | 3.114500  | 2.684900  | -0.195000 |
| C | 2.089800  | 2.780100  | -2.101200 |
| H | 0.706400  | 3.944000  | 3.712000  |
| H | -0.530900 | 4.173200  | 2.477200  |
| H | -0.009100 | 2.536900  | 2.926200  |
| H | 3.012000  | 2.915200  | -2.673800 |
| H | 1.827300  | 1.717600  | -2.151400 |
| H | 1.304600  | 3.350900  | -2.608900 |

### 2e-barbital

Sum of electronic and zero point energies: -1699.521137 Hartree

Lowest Frequency: 8.1 cm<sup>-1</sup>

Coordinates: B3LYP/6-31+G(d,p) IEF-PCM CHCl<sub>3</sub>

| Atom | x         | y         | z        |
|------|-----------|-----------|----------|
| N    | -0.824500 | -1.664100 | 0.325300 |

|   |           |           |           |
|---|-----------|-----------|-----------|
| C | 0.160200  | -2.581600 | 0.336900  |
| C | -2.097800 | -2.079500 | 0.498700  |
| C | -0.079400 | -3.948800 | 0.525400  |
| N | 1.466000  | -2.074500 | 0.196600  |
| C | -2.433400 | -3.424800 | 0.700800  |
| N | -3.058500 | -1.058500 | 0.418400  |
| C | -1.396500 | -4.354200 | 0.710400  |
| H | 0.739200  | -4.653200 | 0.524500  |
| C | 2.524100  | -2.743900 | -0.389500 |
| H | 1.603000  | -1.098000 | 0.461000  |
| H | -3.463900 | -3.711300 | 0.843100  |
| C | -4.382700 | -1.105500 | 0.808600  |
| H | -2.739100 | -0.185400 | -0.000100 |
| H | -1.619700 | -5.405500 | 0.864200  |
| O | 2.391800  | -3.827100 | -0.963500 |
| C | 3.859900  | -2.075000 | -0.296800 |
| O | -4.889900 | -2.087100 | 1.353100  |
| C | -5.176200 | 0.159600  | 0.519600  |
| C | 4.245500  | -1.281100 | 0.791500  |
| C | 4.789100  | -2.315600 | -1.323200 |
| H | -5.744400 | 0.383700  | 1.429000  |
| H | -4.496600 | 0.996600  | 0.333700  |
| C | 5.530500  | -0.735600 | 0.845300  |
| H | 3.558800  | -1.096800 | 1.610400  |
| C | 6.060700  | -1.753600 | -1.270700 |
| H | 4.498600  | -2.944800 | -2.158000 |
| C | 6.456800  | -0.954400 | -0.183100 |
| H | 5.815800  | -0.133600 | 1.703900  |
| H | 6.761200  | -1.940200 | -2.081000 |
| C | -6.176100 | 0.059300  | -0.678000 |
| C | -7.299900 | -0.951900 | -0.381800 |
| H | -6.907100 | -1.961300 | -0.234700 |
| H | -7.852300 | -0.673900 | 0.523300  |
| H | -8.010300 | -0.976700 | -1.216400 |
| C | -6.796000 | 1.459100  | -0.866700 |
| H | -6.030800 | 2.203800  | -1.114400 |
| H | -7.529600 | 1.446200  | -1.680900 |
| H | -7.310800 | 1.790100  | 0.042900  |
| C | -5.436600 | -0.346000 | -1.968500 |
| H | -4.620100 | 0.348800  | -2.194400 |
| H | -5.013600 | -1.353900 | -1.893600 |
| H | -6.128000 | -0.341500 | -2.818700 |
| C | 7.845500  | -0.363800 | -0.129100 |
| H | 8.607200  | -1.151700 | -0.101100 |
| H | 8.048800  | 0.248100  | -1.015300 |
| H | 7.978700  | 0.265100  | 0.755200  |
| H | -0.415000 | 0.237100  | 0.142200  |
| N | -0.192900 | 1.249200  | 0.048500  |
| C | 1.057900  | 1.665100  | 0.446900  |
| C | -1.189800 | 2.048800  | -0.466600 |
| C | 1.425500  | 3.141700  | 0.308800  |

|   |           |          |           |
|---|-----------|----------|-----------|
| O | 1.853300  | 0.846400 | 0.898200  |
| N | -0.882200 | 3.387000 | -0.614000 |
| O | -2.290000 | 1.599400 | -0.772900 |
| C | 0.311100  | 4.009900 | -0.276900 |
| C | 1.795500  | 3.697300 | 1.721200  |
| C | 2.677000  | 3.252600 | -0.620700 |
| H | -1.619400 | 3.972800 | -0.994300 |
| O | 0.441100  | 5.210800 | -0.450800 |
| H | 2.648900  | 3.112400 | 2.075700  |
| H | 2.136800  | 4.726000 | 1.574400  |
| C | 0.667900  | 3.662400 | 2.758400  |
| H | 2.962300  | 4.308400 | -0.637800 |
| H | 3.482800  | 2.698800 | -0.130800 |
| C | 2.483400  | 2.738300 | -2.051300 |
| H | 1.025300  | 4.074200 | 3.706800  |
| H | -0.194400 | 4.262000 | 2.447100  |
| H | 0.322500  | 2.641600 | 2.955500  |
| H | 3.413100  | 2.859200 | -2.615100 |
| H | 2.225200  | 1.674200 | -2.074100 |
| H | 1.703700  | 3.291900 | -2.585900 |

### 2f-barbital

Sum of electronic and zero point energies: -1774.72628 Hartree

Lowest Frequency: 8.3 cm<sup>-1</sup>

Coordinates: B3LYP/6-31+G(d,p) IEF-PCM CHCl<sub>3</sub>

| Atom | x         | y         | z         |
|------|-----------|-----------|-----------|
| N    | -1.039100 | -1.654200 | 0.348500  |
| C    | -0.036500 | -2.551300 | 0.391200  |
| C    | -2.307400 | -2.092500 | 0.501300  |
| C    | -0.253800 | -3.920700 | 0.591500  |
| N    | 1.261400  | -2.020300 | 0.271700  |
| C    | -2.620900 | -3.441300 | 0.712300  |
| N    | -3.285500 | -1.091100 | 0.388200  |
| C    | -1.566100 | -4.349900 | 0.754300  |
| H    | 0.578300  | -4.608900 | 0.616300  |
| C    | 2.340400  | -2.672900 | -0.298900 |
| H    | 1.373400  | -1.040800 | 0.534900  |
| H    | -3.648300 | -3.746800 | 0.836800  |
| C    | -4.613700 | -1.155700 | 0.761000  |
| H    | -2.975700 | -0.219900 | -0.041500 |
| H    | -1.771800 | -5.403600 | 0.916300  |
| O    | 2.227300  | -3.756400 | -0.878200 |
| C    | 3.662200  | -1.987600 | -0.185900 |
| O    | -5.110000 | -2.136600 | 1.316900  |
| C    | -5.426200 | 0.088900  | 0.437500  |
| C    | 4.007100  | -1.133400 | 0.878000  |
| C    | 4.628400  | -2.262400 | -1.163600 |
| H    | -6.007700 | 0.322300  | 1.336100  |
| H    | -4.759300 | 0.933600  | 0.240600  |
| C    | 5.273900  | -0.568700 | 0.951500  |

|   |           |           |           |
|---|-----------|-----------|-----------|
| H | 3.295000  | -0.918100 | 1.666400  |
| C | 5.898200  | -1.688900 | -1.111900 |
| H | 4.374200  | -2.934800 | -1.976100 |
| C | 6.226200  | -0.835300 | -0.046500 |
| H | 5.548200  | 0.079100  | 1.777800  |
| H | 6.615400  | -1.913400 | -1.891900 |
| C | -6.411000 | -0.054300 | -0.768200 |
| C | -7.521200 | -1.077400 | -0.461700 |
| H | -7.113000 | -2.076300 | -0.287600 |
| H | -8.088300 | -0.788700 | 0.430900  |
| H | -8.221600 | -1.132800 | -1.303200 |
| C | -7.051400 | 1.330400  | -0.995100 |
| H | -6.295600 | 2.082300  | -1.249500 |
| H | -7.774300 | 1.287600  | -1.817900 |
| H | -7.583300 | 1.672400  | -0.099500 |
| C | -5.649900 | -0.476200 | -2.040700 |
| H | -4.844900 | 0.229100  | -2.275400 |
| H | -5.207600 | -1.473100 | -1.936100 |
| H | -6.332000 | -0.506600 | -2.897800 |
| O | 7.433700  | -0.226600 | 0.107600  |
| C | 8.455800  | -0.467000 | -0.863800 |
| H | 8.143700  | -0.126200 | -1.857200 |
| H | 9.317600  | 0.112500  | -0.533600 |
| H | 8.721000  | -1.529200 | -0.902400 |
| H | -0.666300 | 0.244400  | 0.158200  |
| N | -0.462100 | 1.260500  | 0.060700  |
| C | 0.762100  | 1.708300  | 0.504000  |
| C | -1.456200 | 2.033200  | -0.498900 |
| C | 1.103400  | 3.190900  | 0.363400  |
| O | 1.556500  | 0.911600  | 0.995000  |
| N | -1.171200 | 3.376000  | -0.651000 |
| O | -2.534900 | 1.557200  | -0.839600 |
| C | -0.005500 | 4.028300  | -0.275200 |
| C | 1.405700  | 3.770200  | 1.782300  |
| C | 2.386900  | 3.317100  | -0.519500 |
| H | -1.905900 | 3.941700  | -1.065000 |
| O | 0.105600  | 5.229800  | -0.458000 |
| H | 2.251800  | 3.203300  | 2.180900  |
| H | 1.737800  | 4.801900  | 1.636100  |
| C | 0.235700  | 3.731800  | 2.771200  |
| H | 2.652500  | 4.378000  | -0.538000 |
| H | 3.184400  | 2.784100  | 0.005800  |
| C | 2.254900  | 2.784100  | -1.950100 |
| H | 0.546500  | 4.161000  | 3.728300  |
| H | -0.621000 | 4.314600  | 2.415700  |
| H | -0.103600 | 2.708800  | 2.967700  |
| H | 3.202600  | 2.914300  | -2.481000 |
| H | 2.014700  | 1.715700  | -1.970300 |
| H | 1.486400  | 3.318800  | -2.518900 |
